# Supplementary material
Source: PubMed Central journal article supplement (PMC6402345)
Supplement: NIHMS1003679-supplement-Supp_Info.pdf [file NIHMS1003679-supplement-Supp_Info.pdf]

Supplement of Atmos. Chem. Phys., 18, 12613–12637, 2018  
<https://doi.org/10.5194/acp-18-12613-2018-supplement>  
© Author(s) 2018. This work is distributed under  
the Creative Commons Attribution 4.0 License.

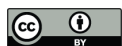

Atmospheric  
Chemistry  
and Physics  
Open Access  
EGU

*Supplement of*

## **Experimental and model estimates of the contributions from biogenic monoterpenes and sesquiterpenes to secondary organic aerosol in the southeastern United States**

**Lu Xu et al.**

*Correspondence to:* Nga Lee Ng ([ng@chbe.gatech.edu](mailto:ng@chbe.gatech.edu))

The copyright of individual parts of the supplement might differ from the CC BY 4.0 License.

## 10 **S1. Experimental Procedure**

11 The perturbation experiments were performed in July-August 2016. A 2m<sup>3</sup> Teflon chamber  
12 (cubic shape) (Fig. 1) was placed outdoor on the rooftop of the Environmental Science and  
13 Technology (ES&T) building on the Georgia Institute of Technology (GT) campus, which is 30-  
14 40m above the ground and 840m away from interstate I75/85. The eight corners of the chamber  
15 were open (~2''×2'') to the atmosphere to allow for continuous exchange of air with the atmosphere.  
16 All analytical instruments were placed inside the building, which is about 4-5m away from the  
17 chamber. The instruments were connected to the chamber using 1/4'' teflon tubings (for  
18 measurements of gas-phase species) or stainless steel tubings (for measurement of particle-phase  
19 species). The sampling inlets were inserted into the center of the chamber.

20 The perturbation procedure is described below and illustrated in Fig. A1. Firstly, we  
21 continuously flushed the chamber with ambient air using two fans, which were placed at two  
22 corners of the chamber. During this flushing period, all instruments sampled ambient air and were  
23 not connected to the chamber. The flushing period lasted at least 3 hours to ensure that the air  
24 composition in the chamber is the same as ambient composition. Secondly, we stopped both fans  
25 and connected all instruments to chamber. Due to particle wall loss in the chamber, the particle  
26 mass concentration in the chamber was lower than that in the atmosphere (Fig. A1), but the particle  
27 composition in the chamber was almost the same as that in the atmosphere (Fig. S10), because the  
28 particle wall loss mainly depends on particle size not particle composition (Keywood et al., 2004).  
29 Due to the continued sampling by the instruments (~20 liter per minute, LPM) and the open corners  
30 of the chamber, ambient air continuously entered the chamber, even the two fans were turned off  
31 during this period. The main reason to turn off the fans is to increase the residence time of species  
32 in the chamber. The main reasons to leave the eight corners of chamber open are (a) to supply the  
33 chamber with atmospheric oxidants and (b) ensure that air composition in the chamber is  
34 representative of ambient composition. Thirdly, after sampling the chamber for about 30min, we  
35 injected certain amount of VOC (liquid) into the chamber with a needle, which vaporized upon  
36 injection. We continuously monitored the chamber composition for ~40 min after VOC injection.  
37 Lastly, we disconnected all instruments from the chamber, sampled ambient air, and turned on two  
38 fans to flush the chamber to prepare for the next perturbation experiment. In brief, one perturbation  
39 experiment can be divided into the following four periods: Amb\_Bf (30min ambient measurement  
40 period before sampling chamber), Chamber\_Bf (from sampling chamber to VOC injection, a

41 period ~30min), Chamber\_Af (from VOC injection to stop sampling chamber, a period ~40min),  
42 and Amb\_Af (30min ambient measurement period after sampling chamber).

43 One to three experiments were performed per day. The interval between two experiments  
44 was at least 3 hours, which avoids the interference of chamber content from previous experiments.  
45 The perturbations were performed at different times of day to probe aerosol formation under  
46 different reaction conditions. 0.2  $\mu\text{L}$   $\alpha$ -pinene or  $\beta$ -caryophyllene was injected via a needle into  
47 the chamber. This provides initial concentrations of  $\alpha$ -pinene and  $\beta$ -caryophyllene to be 14ppb  
48 and 10ppb in the chamber, respectively, assuming they are well mixed in the  $2\text{m}^3$  chamber. For  
49 isoprene and *m*-xylene perturbation experiments, we tried a range of initial VOC concentrations  
50 (i.e., 10-90ppb for isoprene and 10-540ppb for *m*-xylene). For naphthalene perturbation  
51 experiments, we injected naphthalene by passing pure air over solid naphthalene flakes. We did  
52 not observe OA formation from these three VOCs, regardless of VOC concentration. The possible  
53 reasons of the lack of OA formation will be discussed in section S6. Due to no OA formation, the  
54 details about perturbation experiments with isoprene, *m*-xylene, and naphthalene are not included  
55 in Table S4.

56 In this study, we selected  $\alpha$ -pinene and  $\beta$ -caryophyllene as representatives of monoterpenes  
57 and sesquiterpenes due to the following reasons. Firstly, both VOCs are widely studied in the  
58 literature. Secondly, they are the most abundant species in monoterpenes and sesquiterpenes,  
59 respectively (Guenther et al., 2012; Helmig et al., 2007). Thirdly, the mass spectra of SOA from  
60 VOCs in the same class generally share similar features. For example, the correlation coefficient  
61 (i.e.,  $R$ ) between the mass spectra of SOA from the  $\beta$ -caryophyllene and  $\alpha$ -humulene is 0.97  
62 (Bahreini et al., 2005). Still using the mass spectra reported in Bahreini et al. (2005), the  $R$  between  
63  $\alpha$ -pinene SOA and other monoterpenes SOA ( $\beta$ -pinene,  $\alpha$ -terpinene, myrcene, and terpinolene) is  
64 larger than 0.9. Fourthly, in addition to the similar mass spectra, the time series of  $\alpha$ -pinene in the  
65 southeastern U.S. is similar to that of other monoterpenes, such as  $\beta$ -pinene and camphene (Xu et  
66 al., 2015a). Further studies with other monoterpenes and sesquiterpenes are still required to  
67 confirm the representativeness of  $\alpha$ -pinene and  $\beta$ -caryophyllene.

68 In the perturbation experiments, we aimed to produce small amount of SOA, which would  
69 not substantially perturb the composition of existing organic aerosol. The difference in OA  
70 concentration between “Chamber\_Bf” and “Chamber\_Af” is within  $4\ \mu\text{g m}^{-3}$  (Fig. S11) and the

71 OA mass spectrum in Chamber\_Af is almost identical to that in Chamber\_Bf (Fig. S12). In the  $\alpha$ -  
72 pinene and  $\beta$ -caryophyllene experiments, the concentrations of inorganic species, including SO<sub>4</sub>,  
73 NO<sub>3</sub>, and NH<sub>4</sub>, during “Chamber\_Bf” and “Chamber\_Af” are shown in Fig. S11.

## 74 **S2. High Resolution Time-of-Flight Aerosol Mass Spectrometer (HR-ToF-AMS)**

75 The HR-ToF-AMS measures the chemical composition and size distribution of submicron  
76 non-refractory species (NR-PM<sub>1</sub>) with high temporal resolution. The details about HR-ToF-AMS  
77 principles have been extensively discussed in the literature (Canagaratna et al., 2007; DeCarlo et  
78 al., 2006). In brief, HR-ToF-AMS samples particles through an aerodynamic lens and then impacts  
79 the particles on a ~600°C tungsten surface. Non-refractory species are flash evaporated and the  
80 resultant vapors are ionized by 70eV electron impact ionization. The generated ions are analyzed  
81 using time-of-flight mass spectrometry. In this study, the temporal resolution of HR-ToF-AMS  
82 measurements was set to be 2 minutes and the instrument was only operated in V mode (resolving  
83 power ~2100 at  $m/z$  200). Ambient filter measurements (with a HEPA filter placed at the inlet of  
84 sampling line) were performed periodically to eliminate gas-phase interference on the particle-  
85 phase measurements by the HR-ToF-AMS. Ionization efficiency (IE) calibrations were conducted  
86 every week with 300nm ammonium nitrate (AN) particles. A nafion dryer was placed upstream of  
87 the HR-ToF-AMS to dry particles (relative humidity < 20%), which eliminated the potential effect  
88 of relative humidity on particle collection efficiency (CE) at the HR-ToF-AMS vaporizer (Matthew  
89 et al., 2008). The composition-dependent CE (i.e., CDCE) was applied to the data, based on the  
90 algorithm proposed by Middlebrook et al. (Middlebrook et al., 2012). The elemental ratios, such as  
91 atomic O:C and H:C, were calculated based on the method in Canagaratna et al. (Canagaratna et  
92 al., 2015). The data analysis was performed using the standard AMS analysis toolkits SQUIRREL  
93 v1.57H and PIKA v1.16H in Igor Pro 6.36 (WaveMetrics Inc.).

## 94 **S3. Positive Matrix Factorization (PMF) Analysis**

95 Positive Matrix Factorization (PMF) analysis has been widely used for aerosol source  
96 apportionment in the atmospheric chemistry community (Jimenez et al., 2009; Crippa et al., 2014;  
97 Xu et al., 2015a). PMF solves bilinear unmixing factor model (Paatero and Tapper, 1994; Ulbrich  
98 et al., 2009b)

$$99 \quad X = TS \times MS + E \quad \text{Eqn 2}$$

100 X is an  $m \times n$  matrix, representing  $m$  measurements over time of  $n$  species (i.e.,  $m/z$  in AMS  
101 measurements). TS is an  $m \times p$  matrix, representing the factor strength (i.e., concentration in AMS  
102 measurements) of the  $p$  factors. MS is an  $p \times n$  matrix, representing the source profile (i.e., mass  
103 spectra in AMS measurements) of the  $p$  factors. E is an  $m \times n$  matrix, representing the unexplained  
104 residual by the  $p$  factors. PMF solves the equation by minimizing the summed least squares errors  
105 of the fit weighted with the error estimates of each measurement. In other words, PMF represents  
106 the observed organic mass spectra as a linear combination of a number of factors with constant  
107 mass spectra but varying concentrations over time. PMF groups OA constituents with similar mass  
108 spectra and temporal variation into different factors, which are related to characteristic sources and  
109 atmospheric processes.

110 In this study, we performed PMF analysis on the high-resolution mass spectra of organic  
111 species (inorganic species are excluded) of combined ambient and perturbation data. Each OA  
112 factor has a constant mass spectrum throughout the study, regardless of ambient or chamber  
113 periods. The organic data matrix and error matrix were generated from PIKA v1.16H and  
114 processed in the PMF Evaluation Toolkit (PET) software or Solution Finder (SoFi)  
115 software (Ulbrich et al., 2009b).  $m/z$ 's with signal-to-noise ratio between 0.2 and 2 were  
116 downweighted by a factor of 2 to reduce disproportionate effects on the results (Ulbrich et al.,  
117 2009a). We do not observe  $m/z$ 's with signal-to-noise ratio smaller than 0.2. The errors of all  $\text{CO}_2^+$   
118 related peaks (i.e.,  $\text{O}^+$ ,  $\text{HO}^+$ ,  $\text{H}_2\text{O}^+$ ,  $\text{CO}^+$ , and  $\text{CO}_2^+$ ) were downweighted, to avoid excessive  
119 weighting of  $\text{CO}_2^+$ . The error of  $\text{CHO}^+$  ( $m/z$  29.0027) was downweighted by a factor of 2 as its  
120 error appears to be underestimated, possibly due to interference from its adjacent  $\text{N}_2$  isotope ion  
121 ( $m/z$  29.0032). We utilized the PMF2 solver, which does not require a priori information and  
122 reduces subjectivity. We performed 100 bootstrapping runs to quantify the uncertainty of PMF  
123 results.

124 Fig. 2 shows the time series and mass spectra of OA factors resolved in the measurements.  
125 Five OA factors (i.e., HOA, COA, isoprene-OA, LO-OOA, and MO-OOA) are resolved. PMF  
126 solutions with more than five OA factors display splitting behavior of existing factors instead of  
127 providing new factors. Also, we note that PMF solutions with more OA factors cannot resolve one  
128 factor that is capable of representing all perturbation induced SOA. The five identified OA factors

129 have been extensively discussed in previous studies (Xu et al., 2015a; Xu et al., 2015b; Xu et al.,  
130 2017). Below, we describe the unique features of these OA factors.

131 The mass spectrum of hydrocarbon-like OA (HOA) is dominated by hydrocarbon-like ions  
132 ( $C_xH_y^+$  ions), which is similar to that of primary combustion emission species (Zhang et al., 2011).  
133 The time series of HOA correlates well with primary emissions (i.e., black carbon and  $NO_x$ ). Thus,  
134 HOA is a surrogate of primary OA from vehicle emissions (Zhang et al., 2011).

135 The mass spectrum of cooking OA (COA) is characterized by prominent signal at ions  
136  $C_3H_5^+$  ( $m/z$  41) and  $C_4H_7^+$  ( $m/z$  55), which is similar to the mass spectrum of unsaturated fatty acids  
137 (Huang et al., 2010; Mohr et al., 2009). Cooking is an important source of primary emission in  
138 urban sites (Xu et al., 2015a; Crippa et al., 2014; Huang et al., 2010), the concentration of which is  
139 even higher than HOA concentration sometimes (Huang et al., 2010). We have clear evidence that  
140 the COA factor at the measurement site has contributions from cooking activities. Firstly, the  
141 diurnal variation of COA peaks during meal times (Fig. S6a). Secondly, in another dataset from  
142 the same measurement site, the COA concentration shows clear increases on football days,  
143 consistent with barbecue activities on campus and close to the measurement site. Thirdly,  
144 compared to most of days during 2015 measurement (section S4), the COA concentration is higher  
145 between August 13<sup>th</sup> and 16<sup>th</sup>, 2015 (Fig. S6b and S6c). These four days are right before the start  
146 of a new semester and thus there are many fraternity rush events (i.e., barbecue activities) on  
147 campus. However, the COA concentration increases in 5 out of 6  $\beta$ -caryophyllene perturbation  
148 experiments and its enhancement amount is  $\sim 25\%$  of LO-OOA enhancement (Fig. S5b), which  
149 shows that COA factor could have interference from  $\beta$ -caryophyllene SOA. Thus, caution is  
150 required when using COA factor as a surrogate for cooking emissions, especially for urban sites  
151 influenced by air masses from forested areas.

152 Ample evidence suggests that the isoprene-derived OA (isoprene-OA) factor is related to  
153 the reactive uptake of isoprene oxidation products, isoprene epoxydiols (IEPOX) (Xu et al., 2015a;  
154 Lin et al., 2012; de Sá et al., 2016). Firstly, the mass spectrum of isoprene-OA is characterized by  
155 prominent signal at ions  $C_4H_5^+$  ( $m/z$  53) and  $C_5H_6O^+$  ( $m/z$  82), which is similar to the mass spectrum  
156 of laboratory IEPOX SOA (Lin et al., 2012). Secondly, the time series of this factor correlates well  
157 with 2-methyltols, which are tracers for isoprene SOA tracers and likely formed from the reactive  
158 uptake of IEPOX. This factor is also referred to as “IEPOX-OA” in some studies (Hu et al., 2015;

159 Budisulistiorini et al., 2013; Budisulistiorini et al., 2015; de Sá et al., 2017). The isoprene-OA  
160 factor contributes 18-36%, 34%, and 24% of OA in the southeastern U.S. (Xu et al., 2015a),  
161 Amazonia forest (Chen et al., 2015), and boreal forest (Robinson et al., 2011). Our perturbation  
162 experiments point out the possibility that isoprene-OA factor could have interference from  $\alpha$ -  
163 pinene SOA. From another aspect, the enhancement in isoprene-OA in these experiments suggests  
164 that fresh  $\alpha$ -pinene SOA is not exclusively apportioned to LO-OOA, at least for the sites with  
165 isoprene-OA.

166 Less-oxidized oxygenated organic aerosol (LO-OOA) and more-oxidized oxygenated  
167 organic aerosol (MO-OOA) are named based on their differing carbon oxidation state. MO-OOA  
168 has the highest atomic O:C ratio, indicating that it is highly oxidized. LO-OOA has lower O:C  
169 ratio than MO-OOA. In the southeastern U.S., MO-OOA concentration peaks in the afternoon and  
170 LO-OOA exhibits a daily maximum at night (Xu et al., 2015b).

171 We examined the PMF residual (i.e.,  $Q/Q_{\text{exp}}$ ) in  $\alpha$ -pinene and  $\beta$ -caryophyllene perturbation  
172 experiments. As shown in Fig. S13a, in  $\alpha$ -pinene experiments, the difference in  $Q/Q_{\text{exp}}$  between  
173 “Chamber\_Bf” (before  $\alpha$ -pinene injection) and “Chamber\_Af” (after  $\alpha$ -pinene injection) is not  
174 statistically significant. This suggests that PMF analysis has adequately accounted for the newly  
175 formed  $\alpha$ -pinene SOA. In contrast, in  $\beta$ -caryophyllene experiments, there is a clear pattern that  
176  $Q/Q_{\text{exp}}$  in “Chamber\_Af” is larger than that in “Chamber\_Bf” (Fig. S13b). This likely arises from  
177 the rapid change in the subtleties of OA composition caused by the newly formed  $\beta$ -caryophyllene  
178 SOA. The larger  $Q/Q_{\text{exp}}$  in  $\beta$ -caryophyllene experiments than  $\alpha$ -pinene experiments may be a result  
179 of that  $\Delta\text{OA}$  (i.e., the difference in OA concentration between “Chamber\_Af” and “Chamber\_Bf”)  
180 is larger in  $\beta$ -caryophyllene experiments (average value  $1.95 \mu\text{g m}^{-3}$  over 6 experiments) than  $\alpha$ -  
181 pinene experiments (average value  $0.98 \mu\text{g m}^{-3}$  over 14 experiments). The behavior of  $Q/Q_{\text{exp}}$  is  
182 not quite expected because the OA mass spectra after injecting  $\beta$ -caryophyllene are almost  
183 identical to those before perturbation (i.e., R between Chamber\_Bf and Chamber\_Af is  $>0.99$  as  
184 shown in Fig. S12b). The larger  $Q/Q_{\text{exp}}$  in Chamber\_Af likely results in the unexpected decrease  
185 in MO-OOA and isoprene-OA decrease after injecting  $\beta$ -caryophyllene. It is possible that the  
186 larger  $Q/Q_{\text{exp}}$  in Chamber\_Af and the decrease in MO-OOA and isoprene-OA are a result of the  
187 limitation of PMF analysis, that is, PMF assumes constant mass spectra of OA factors. After  $\beta$ -  
188 caryophyllene SOA formation in the chamber, in order to optimize the overall fitting residual,  
189 PMF solver increases the concentrations of LO-OOA and COA, the mass spectra of which are

190 more similar to  $\beta$ -caryophyllene SOA, and decreases the concentration of MO-OOA and isoprene-  
191 OA, the mass spectra of which are less similar to  $\beta$ -caryophyllene SOA.

192 We would like to clarify that our conclusions are not dependent on if PMF has perfectly  
193 accounted for the newly formed SOA, mainly because similar issues could also happen in the  
194 analysis of ambient data. The  $\beta$ -caryophyllene perturbation experiments simulate a scenario when  
195 there is a sudden change in the OA composition caused by an air mass encountering a plume or  
196 change in OA sources due to shift in wind direction. Under these circumstances, PMF analysis  
197 may have difficulty in accurately apportioning the OA sources. The simulated scenarios and the  
198 observed PMF issues have been observed in previous studies. For example, in the Figure 9 of Sun  
199 et al. (2016), an increase of hydrocarbon-like OA (HOA) is usually accompanied by a decrease in  
200 cooking OA (COA) and vice versa. Another example is that figure 5 of Reyes-Villegas et al. (2018)  
201 showed that a biomass burning plume leads to unexpected rapid variations in the concentration of  
202 many OA factors on the time scale of minutes. Last example is that in the figure S10 of Milic et  
203 al. (2017), the PMF residual during a biomass burning plume is orders of magnitude higher than  
204 other sampling periods.

#### 205 **S4. Description of Measurements at GT Site in Different Years**

206 In addition to the perturbation experiments in 2016, we deployed AMS measurements in  
207 summer of 2012, 2013, and 2015 (Table S5) at the GT site (Xu et al., 2015a; Xu et al., 2017). The  
208 same five OA factors are resolved and the mass fractions of these OA factors do not change  
209 substantially over the past 5 years (Fig. S14), suggesting relatively stable OA sources over the past  
210 5 years near this measurement site.

211 The 2012 measurements are used for the pseudo-experiment discussed in Appendix A. It  
212 is because the 2012 data set has the least interruption in ambient measurements. For example, in  
213 2016, the perturbation experiments resulted in many gaps in the ambient measurements. In 2013,  
214 AMS alternated sampling between ambient line and a treated sampling line every 30min (Xu et  
215 al., 2017). Since measurements were performed around similar time of year each year and the mass  
216 fractions of these OA factors remain relatively constant over the past 5 years, this justifies the use  
217 2012 data set for the pseudo-experiment (i.e., this data set can be considered as representative of  
218 other years).



## 219 **S5. Community Multiscale Air Quality (CMAQ) Model**

220 We use the CMAQ (Community Multiscale Air Quality) atmospheric chemical transport  
221 model to simulate the SOA formation in the southeastern U.S. CMAQ is one of the most widely  
222 used air quality models. CMAQ v5.2gamma (available at: <https://github.com/USEPA/CMAQ>) is  
223 run over the continental U.S. for time periods between May 2012 to July 2013 with 12km × 12km  
224 horizontal resolution. We focus our analysis on the southeastern U.S., which comprises 11 states  
225 (as Arkansas, Alabama, Florida, Georgia, Kentucky, Louisiana, Mississippi, North Carolina, South  
226 Carolina, Tennessee, and Virginia). 10 days of model spin-up are discarded before comparisons  
227 are made with measurements. The meteorological inputs are generated with version 3.8 of the  
228 Weather Research and Forecasting model (WRF), Advanced Research WRF (ARW) core.  
229 Compared to previous versions of WRF, WRF v3.8 has major revisions in the vertical mixing  
230 scheme (Appel et al., 2017). We also apply lightning assimilation to improve convective rainfall  
231 (Heath et al., 2016). Anthropogenic emissions are based on the EPA (Environmental Protection  
232 Agency) NEI (National Emission Inventory) 2011 v2. For the CTR\_June period, the primary  
233 emissions from stationary source fuel combustion and industry are reduced to half in Alabama,  
234 because previous studies showed that CMAQ overestimates the primary organic carbon in  
235 Alabama during this period (Pye et al., 2015). Biogenic emissions are predicted by the BEIS  
236 (Biogenic Emission Inventory System) v3.6.1. Carlton and Baker (2011) found that the BEIS  
237 predicted isoprene emission is generally lower than that predicted by another widely used model  
238 MEGAN (Model of Emissions of Gases and Aerosols from Nature). Also, Pye et al. (2017) showed  
239 that increasing the BEIS predicted isoprene emission by 50% could result in a better agreement  
240 with measured isoprene and OH at Centreville, AL. Thus, the isoprene emission is increased by  
241 50% in this study.

242 The gas-phase chemistry is based on CB6r3 (Carbon Bond v6.3,  
243 [http://www.camx.com/files/udaq\\_snowchem\\_final\\_6aug15.pdf](http://www.camx.com/files/udaq_snowchem_final_6aug15.pdf)). The default organic aerosol  
244 treatment in CMAQ v5.2gamma generally follows the scheme of Carlton et al. (2010) and Appel  
245 et al. (2017) and is the same as that publicly released in CMAQ v5.2 and v5.2.1  
246 (doi:10.5281/zenodo.1212601). A schematic of SOA treatment in CMAQ v5.2 is shown in Fig.  
247 S2a. In brief, CMAQ v5.2 includes SOA formation from anthropogenic and biogenic emissions.  
248 Anthropogenic precursors include benzene, toluene, xylene, long-chain alkanes (such as  
249 heptadecane), and PAHs (such as naphthalene). Biogenic precursors include isoprene,

250 monoterpenes, and sesquiterpenes. An Odum 2-product parameterization is used to describe SOA  
251 formation from these precursors. The SOA yields from monoterpene reactions with different  
252 oxidants (OH, ozone) are assumed to be the same and are based on daylight experiments of Griffin  
253 et al. (1999) The SOA yield from sesquiterpenes oxidation is parameterized in an analogous way  
254 as that of monoterpenes (Carlton et al., 2010). Five different species of monoterpenes are lumped  
255 into one species (i.e., TERP) according to U.S. emissions-based weighting factors. SOA formation  
256 from the reactive uptake of IEPOX and methacryloylperoxynitrate (MPAN) (isoprene oxidation  
257 products) onto aqueous aerosol is included. All semi-volatile OA in the model can undergo  
258 particle-phase oligomerization to produce non-volatile OA with a 29hr lifetime. POA is treated as  
259 semi-volatile. A parameterization to consider the SOA from semivolatile and intermediate  
260 volatility organic compounds (SVOC and IVOC, the emissions of which may not be characterized  
261 in current emission inventories) as well as other missing sources of SOA from anthropogenic  
262 combustion (potentially due to underestimated yields) is implemented (Murphy et al., 2017b).

263 The “default simulation” applies the default treatment of SOA in CMAQ v5.2 with CB6r3  
264 as discussed above. The “updated simulation” in this work improves the “default simulation” by  
265 implementing the following recent scientific findings (Fig. S2b). Firstly, recent laboratory studies  
266 reveal significant amount of SOA formation from monoterpenes (except  $\alpha$ -pinene, denoted as  
267  $MT_{w/o \alpha\text{-pinene}}$ ) oxidation by  $NO_3$  (Boyd et al., 2015; Fry et al., 2014). This SOA formation pathway  
268 is currently missing in CMAQ v5.2 with CB6r3 chemistry. We implement the formation and  
269 partition of organic nitrates from monoterpenes via multiple reaction pathways (i.e., oxidation by  
270  $NO_3$  and oxidation by OH/ $O_3$  followed by  $RO_2+NO$ ), which are extensively described in Pye et al.  
271 (2015). In brief, the organic nitrates produced from  $MT_{w/o \alpha\text{-pinene}}$  oxidation by  $NO_3$  and MT  
272 oxidation by OH and  $O_3$  in the presence of  $NO_x$  are lumped into a new species:  $MTNO_3$ .  $MTNO_3$   
273 is semi-volatile and undergoes gas/particle partitioning. The particle-phase  $MTNO_3$  hydrolyzes  
274 with a 3hr lifetime and converts to  $HNO_3$  and non-volatile SOA (denoted as AMTHYD in model).  
275 We note that the hydrolysis rate of organic nitrates is highly uncertain, which largely depends on  
276 the structure of organic nitrates and particle acidity (Boyd et al., 2015; Jacobs et al., 2014;  
277 Rindelaub et al., 2016). Pye et al. compared model performance using 3hr vs 30hr hydrolysis rate  
278 (Pye et al., 2015). While the 3hr hydrolysis rate leads to better agreements with measured OC and  
279  $NO_y$ , it degrades the comparison with measured  $HNO_3$ . In this study, we perform sensitivity study  
280 by using both 3hr and 30hr hydrolysis rate. 30hr hydrolysis lower the modeled  $SOA_{MT+SQT}$

281 concentration by 2-17% for all sites compared to 3hr hydrolysis, but it does not change the  
282 conclusion of this study. Future studies are warranted to constrain the fate of organic nitrates.

283 The second modification is to update the SOA yield of the monoterpenes oxidation by O<sub>3</sub>  
284 and OH. In the default SOA treatment, the SOA yield of lumped monoterpenes oxidation by O<sub>3</sub>  
285 and OH is parameterized based on daylight experiments of Griffin et al. (1999), which are under  
286 high OA loadings and elevated temperature. Extrapolation of the parameterized yield to  
287 atmospherically relevant low OA loading and lower temperatures (<310K) causes uncertainty  
288 (Pathak et al., 2007). In this study, we update the SOA yield of monoterpenes oxidation by O<sub>3</sub> and  
289 OH based on a recent study by Saha and Grieshop (2016). Saha et al. applied a dual-  
290 thermodenuder system to study the  $\alpha$ -pinene ozonolysis SOA. The authors extracted SOA yield  
291 parameters by using an evaporation-kinetics model and volatility basis set (VBS). The SOA yields  
292 in Saha et al. (2016) are higher than laboratory chamber studies conducted in batch mode (Griffin  
293 et al., 1999; Pathak et al., 2007), but comparable to laboratory chamber studies conducted in  
294 continuous mode (Shilling et al., 2008) (Fig. S15). The SOA yields in Saha et al. are consistent  
295 with recent findings about the formation of HOMs (Ehn et al., 2014; Zhang et al., 2015) and help  
296 to explain the observed slow evaporation of  $\alpha$ -pinene SOA (Vaden et al., 2011). In the updated  
297 simulation, we replace the Odum's 2-product model used in the default simulation with VBS  
298 framework. The VBS framework lumps species into a number of volatility "bins" that are  
299 separated by one decade in saturation concentration. When laboratory data are available over a  
300 wide range of loadings and/or temperatures, the VBS framework is more robust and better  
301 represents SOA formation at atmospherically relevant OA loadings than Odum's 2-product model  
302 with limited data (Barsanti et al., 2013). In addition, the new parameterization allows for enthalpies  
303 of vaporization that are more consistent with species of the specified volatility. Specifically,  
304 CMAQ has used enthalpies of vaporization of 40 kJ mol<sup>-1</sup> for C\* of 15 and 134  $\mu\text{g m}^{-3}$ . Species of  
305 this saturation concentration should have much enthalpies of vaporization on the order of 100 kJ  
306 mol<sup>-1</sup> (Epstein et al., 2010). The new parameterization from Saha et al. allows for higher enthalpies  
307 of vaporization that are more realistic. The properties of the lumped MT oxidation products, which  
308 are grouped into 7 volatility "bins", are listed in Table S3. The simulation using modified SOA  
309 treatment is denoted as "updated simulation".

310 The modeled OA concentrations from both default simulation and updated simulation are  
311 compared to AMS measurements. Considering that CMAQ predicts aerosol in 3 log-normal modes

312 and AMS measures  $PM_{10}$ , the modeled mass concentration is adjusted to  $PM_{10}$  based on predicted  
313 aerosol size distributions (Nolte et al., 2015). CMAQ predicts that  $PM_{10}$  concentration accounts for  
314 about 60-70% of  $PM_{2.5}$  concentration. This fraction is similar to the finding in Zhang et al. (2017),  
315 who performed simultaneous measurements of non-refractory  $PM_{2.5}$  (using an AMS with a new  
316  $PM_{2.5}$  inlet) and non-refractory  $PM_{10}$  (using an AMS with a traditional  $PM_{10}$  inlet) in Nanjing, China.  
317 The authors showed that non-refractory  $PM_{10}$  accounts for about half of non-refractory  $PM_{2.5}$ . The  
318  $PM_{10}/PM_{2.5}$  fraction needs to be further verified for sites in the U.S.

319 Fig. S16 compares the diurnal trends of AMS OA with CMAQ OA in both default  
320 simulation and updated simulation. The JST and GT sites are in the same grid cell in CMAQ. The  
321 modeled OA in default simulation under-estimates measured OA by 36-54%. The updated  
322 simulation predicts more OA, which reduces model bias and agrees better with measured OA. The  
323 model skill in updated simulation is slightly improved as the correlation between model and  
324 measurement is better (Fig. S17). However, the updated simulation still under-estimates OA,  
325 mainly in the afternoon, suggesting missing OA sources.

326 We further evaluate the modeled SOA from the oxidation of monoterpenes and  
327 sesquiterpenes ( $SOA_{MT+SQT}$ ) against LO-OOA. Based on the ambient perturbation experiments,  
328 84% of fresh  $\alpha$ -pinene SOA is apportioned into LO-OOA and the rest 16% is apportioned into  
329 isoprene-OA (Fig. S5a), when the isoprene-OA factor exists. Thus, for the sites with isoprene-OA  
330 factor, we only consider 84% of modeled SOA from the oxidation of monoterpenes by  $O_3$  and OH  
331 when comparing to LO-OOA. We note that the fraction of MT SOA apportioned into isoprene-  
332 OA factor is uncertain, as this value is obtained at a specific site and in a specific month. This  
333 uncertainty may affect the comparison between modeled  $SOA_{MT+SQT}$  and LO-OOA. More studies  
334 are required to evaluate the interference of MT SOA in isoprene-OA factor in different atmospheric  
335 environments and different seasons. The comparison between LO-OOA and  $SOA_{MT+SQT}$  is  
336 discussed in the main text and shown in Fig. S18, Fig. S19, Fig. S20, and Fig. 6. The  $SOA_{MT+SQT}$   
337 concentration in the default simulation (i.e., no explicit organic nitrate partitioning, Griffin et al.  
338 (1999) photooxidation parameterization) is significantly lower than LO-OOA by 55-84% (Fig.  
339 S20). In contrast,  $SOA_{MT+SQT}$  in the updated simulation (explicit organic nitrates and Saha and  
340 Grieshop (2016) VBS for MT+ $O_3$ /OH) reasonably reproduces the magnitude and diurnal  
341 variability of LO-OOA for each site (Fig. 6a). The model bias is reduced to within ~20% for most  
342 sites, except for Centreville, Alabama (i.e., 43% for CTR\_June dataset). For CTR\_June, the

343 modeled SOA<sub>MT+SQT</sub> is higher than LO-OOA by ~43%. The reason for the over-estimation of LO-  
 344 OOA in CTR\_June is unclear. One possible reason is that CMAQ over-predicts the role of primary  
 345 organic emissions and subsequent OA formation from these emissions, which serve as gas/particle  
 346 partition medium. This suggests that the parameterized potential SOA from combustion sources  
 347 (i.e., pcSOA) may need downward adjustment (Murphy et al., 2017b). The sampling site in CTR  
 348 is surrounded by forests and is far away from stationary point and area sources of primary  
 349 emissions. The marginal influence of primary emissions on the CTR site can be reflected by that  
 350 HOA factor is not resolved from PMF analysis. However, the grid cell containing the CTR site has  
 351 primary emissions. Pye et al. (2015) showed that the POA concentration is over-estimated by a  
 352 factor of 2 in CTR\_June when POA is treated as non-volatile. As gas/particle partition medium, a  
 353 higher POA concentration would enhance the partition of semi-volatiles to the particle phase and  
 354 hence increase the concentration of modeled SOA. The implementation of SOA formation from  
 355 SVOC and IVOC, mainly from anthropogenic emissions, further exaggerates the issue. Another  
 356 possible reason is that the parameterization of MT SOA formation does not consider photo-  
 357 chemical aging. The laboratory experiments used to derive SOA yield parameters typically only  
 358 last few hours. The aging of SOA is likely to decrease the concentration after long time periods  
 359 due to fragmentation. In addition, previous work by Pye et al. (2015), albeit with different  
 360 meteorology indicates monoterpenes as well as their organic nitrates are overestimated by CMAQ  
 361 in the vicinity of CTR. Errors in nocturnal mixing may contribute to errors in SOA, particularly  
 362 from monoterpenes.

### 363 **S6. Simple Box Model**

364 While the focus of this study is to qualitatively understand which OA factors the  $\alpha$ -pinene  
 365 SOA is apportioned into, we also build a simple box model aimed at quantitatively estimating the  
 366 fate of  $\alpha$ -pinene and the SOA formation in the ambient perturbation experiments. The box model  
 367 considers the oxidation of  $\alpha$ -pinene by OH and O<sub>3</sub>, dilution by ambient air, and particle loss to  
 368 chamber wall. We solve the following two ordinary differential equations (ODEs) which are  
 369 derived from mass balance.

$$\frac{d[\alpha\text{-pinene}]}{dt} = -k_{\text{OH}} \times [\alpha\text{-pinene}] \times [\text{OH}] - k_{\text{O}_3} \times [\alpha\text{-pinene}] \times [\text{O}_3] - \frac{F_{\text{out}}}{V_{\text{chamber}}} \times [\alpha\text{-pinene}] \quad \text{Eq. S1}$$

$$\frac{d[\text{SOA}]}{dt} = \text{Yield} \times (k_{\text{OH}} \times [\alpha\text{-pinene}] \times [\text{OH}] + k_{\text{O}_3} \times [\alpha\text{-pinene}] \times [\text{O}_3]) \times 5.6 - \frac{F_{\text{out}}}{V_{\text{chamber}}} \times [\text{SOA}] - k_{\text{wall-loss}} \times [\text{SOA}] \quad \text{Eq. S2}$$

371  $F_{\text{out}}$  is the dilution rate, which is 20 LPM (estimated by sampling flow rates of all instruments).  
372  $V_{\text{chamber}}$  is the chamber volume, which is about 2 m<sup>3</sup>.  $k_{\text{OH}}$  and  $k_{\text{O}_3}$  are the reaction rate constants  
373 for  $\alpha$ -pinene + OH and  $\alpha$ -pinene + O<sub>3</sub>, which are  $5.25 \times 10^{-11}$  and  $9.40 \times 10^{-17}$  cm<sup>3</sup> molecule<sup>-1</sup> s<sup>-1</sup> at  
374 298K, respectively (Jenkin et al., 1997). The constant 5.6 is to convert the  $\alpha$ -pinene concentration  
375 unit from ppb to  $\mu\text{g m}^{-3}$ . *Yield* is defined as the ratio of the amount of SOA formed to the amount  
376 of VOC reacted (Odum et al., 1996), which is assumed to be the same for the oxidation of  $\alpha$ -pinene  
377 by OH and O<sub>3</sub>. The ambient perturbation approach is potentially feasible to directly measure the  
378 SOA yield under real atmospheric conditions. However, certain improvements are required, such  
379 as measuring the concentration of precursor VOC and quantifying the dilution ratio. In the current  
380 box model, *yield* is a tuning parameter. The model only considers the SOA formed from  $\alpha$ -pinene  
381 injected into the chamber and neglects the inflow ambient OA and  $\alpha$ -pinene. Thus, the model  
382 results can be directly compared to the LO-OOA enhancement amount.

383 We use the simple box model to simulate experiment ap\_0801\_1. The O<sub>3</sub> concentration  
384 measured during this experiment is ~55 ppb. The OH concentration is not measured, but assumed  
385 to be  $1 \times 10^6$  or  $2 \times 10^6$  molecule cm<sup>-3</sup> as sensitivity tests. The particle wall loss is difficult to  
386 characterize because the eight corners of the bag are open, so that the change in particle number  
387 concentration can be due to both wall loss and ambient variation. Moreover, the particle wall loss  
388 may vary between experiments because the wind affects the movement of chamber walls and hence  
389 the particle wall loss. Thus, we assume the particle wall loss rate to be  $1 \times 10^{-4}$  s<sup>-1</sup>, which is 100  
390 times higher than the loss rate of 200nm particles in the Georgia Tech Environmental Chamber  
391 facility (Nah et al., 2016) and serves as an upper bound of loss rate. We find that the wall loss rate  
392 has negligible effects on particle mass concentration, compared to other factors.

393 Fig. S21 shows the results from the simple box model. Although ~14 ppb  $\alpha$ -pinene is  
394 injected, most of  $\alpha$ -pinene is carried out of the chamber due to dilution with ambient air (Fig. S21a).  
395 Only 2-5 ppb  $\alpha$ -pinene reacts with oxidants (i.e., O<sub>3</sub> and OH) after 40 min. For the reacted  $\alpha$ -pinene,  
396 roughly half reacts with O<sub>3</sub> and the other half reacts with OH. Fig. S21a also shows the simulated  
397 time series of SOA by using a range of yields. The box model can predict the measured  
398 enhancement amount in SOA using SOA yields of 20-30%, which is consistent with yields  
399 measured from laboratory studies (Saha and Grieshop, 2016; Shilling et al., 2008). Despite the  
400 agreement in magnitude, the predicted SOA concentration peaks later and decreases slower than  
401 measurements. Possible reasons include non-ideal mixing and/or existence of a dead zone in the

402 chamber. Assuming a 1.75 m<sup>3</sup> dead zone in the 2 m<sup>3</sup> chamber can reasonably simulate the temporal  
403 profile of measured SOA (Fig. S21b) with a 10-15 % SOA yield. Roughly 10ppb  $\alpha$ -pinene (10%  
404 of initial concentration) is consumed by O<sub>3</sub>. This amount likely serves as an upper bound because  
405 a 10ppb decrease in O<sub>3</sub> concentration is not observed any experiments. Another uncertain  
406 parameter in the box model is the dilution rate. Increasing the dilution rate would have the same  
407 effect as increasing the volume of dead zone. The dilution rate is estimated to be 20 LPM as  
408 determined by the pulling rates of all instruments. This dilution rate is better constrained than the  
409 volume of dead zone since the instrument sampling rates are known. The reasons for the  
410 discrepancy in OA decrease rate between model and measurements are unclear, but likely due to  
411 a combination of dead zone volume and dilution rate. To understand this discrepancy, future  
412 studies with adequate measurements of more species, particularly the VOCs, are required. The  
413 improved experiments could provide better estimate of SOA yields under real ambient conditions.  
414 Palm et al. (2017) attempted to quantify the SOA yields from the individual VOC by oxidizing  
415 VOC in an oxidation flow reactor (OFR) with ambient air. Note that the extra oxidation is added  
416 in the OFR in Palm et al. (2017), which is different from this study. The discrepancy between  
417 model and measurements in either the magnitude or the decrease rate does not influence the  
418 conclusions in this study, as our focus is to qualitatively understand which OA factors the  $\alpha$ -pinene  
419 SOA is apportioned into.

420 The OA formation in perturbation experiments with isoprene or *m*-xylene is below the  
421 detection limit of the experimental approach. This is mainly due to the low SOA yields or slow  
422 oxidation rates of these VOCs (Ng et al., 2007). We used the simple box model to simulate the  
423 perturbation experiments with isoprene and *m*-xylene. For *m*-xylene experiments, about 90 ppb is  
424 injected. However, due to the slow oxidation rate of *m*-xylene, small SOA yield (i.e., ~5% in Ng  
425 et al. (2007)), and large dilution by ambient air, it is estimated that only about 4 ppb *m*-xylene  
426 reacts with OH after 40min and produces ~0.15-0.30  $\mu\text{g m}^{-3}$  SOA (Fig. S21c). For isoprene,  
427 although its oxidation rate is fast, its SOA yield from non-IEPOX route is low (Xu et al., 2014;  
428 Kroll et al., 2006). The isoprene oxidation products which form SOA are mostly second or higher  
429 generation products. They are not formed in large amount in the relatively short perturbation  
430 experiments (i.e., 40min). The lack of SOA formation in naphthalene experiments is probably due  
431 to naphthalene was not adequately injected into chamber. We injected naphthalene by passing pure  
432 air (1 liter per min) over the solid naphthalene under ambient temperature for 1 min. Due to the

433 relatively low vapor pressure of naphthalene (23.6Pa at 30°C) and rapid dilution in the chamber,  
434 the injected naphthalene concentration could be very low.

### 435 **S7. Laboratory Study on SOA Formation from $\alpha$ -pinene**

436 We performed laboratory experiments to study the SOA formation from  $\alpha$ -pinene under  
437 different NO<sub>x</sub> conditions in the Georgia Tech Environmental Chamber (GTEC) facility. The  
438 facility consists of two 12 m<sup>3</sup> Teflon chambers, which are suspended inside a temperature-  
439 controlled enclosure and surrounded by black lights. The detailed description about chamber  
440 facility can be found in Boyd et al. (2015) The experimental procedures have been discussed in  
441 Tuet et al. (2017) In brief, the chambers are flushed with clean air prior to each experiment. Then,  
442  $\alpha$ -pinene and oxidant sources (i.e., H<sub>2</sub>O<sub>2</sub>, NO<sub>2</sub>, or HONO) are injected into chamber. Once the  
443 concentrations of species stabilize, the black lights are turned on to initiate photooxidation. The  
444 SOA generated by using H<sub>2</sub>O<sub>2</sub> (i.e., NO-free condition), NO<sub>2</sub> (i.e., mid-NO condition), and HONO  
445 (i.e., high NO condition) as oxidant sources are denoted as SOA<sub>lab,H<sub>2</sub>O<sub>2</sub></sub>, SOA<sub>lab,NO<sub>2</sub></sub>, and  
446 SOA<sub>lab,HONO</sub>, respectively.

447 The experimental conditions are summarized in Table S2. We note that more than 100ppb  
448  $\alpha$ -pinene is injected in the experiments using H<sub>2</sub>O<sub>2</sub> and HONO. It is because these two experiments  
449 were designed to produce large amounts of SOA for filter collection and offline analysis (Tuet et  
450 al., 2017). Considering that the OA concentration affects the partitioning of semi-volatile organic  
451 compounds and hence affects the organic mass spectra measured by AMS, we calculate the  
452 average mass spectra in these laboratory studies by only using the data when the OA concentration  
453 is below 10  $\mu\text{g m}^{-3}$ , which is similar to that in our ambient perturbation experiments.

454 The mass spectra of each laboratory-generated SOA (denoted as SOA<sub>lab</sub>) are compared  
455 against the mass spectra of  $\alpha$ -pinene SOA generated during perturbation experiments (denoted as  
456 “SOA<sub>ambient</sub>”). The correlation coefficients (R) between the mass spectra of SOA<sub>lab</sub> and SOA<sub>ambient</sub>  
457 are plotted against the NO concentration during ambient perturbation experiments. We calculate  
458 the organic mass spectra of SOA<sub>ambient</sub> in the following way. Firstly, we scale the magnitude of the  
459 OA mass spectrum during Chamber\_Bf period by the ratio of OA concentration during the  
460 Chamber\_Bf period to that during the extrapolated Chamber\_Bf period. Secondly, we subtract this  
461 scaled OA mass spectrum from that during the Chamber\_Af period. Thirdly, we normalize the  
462 “difference mass spectra” to the difference in organic signal. It is important to note that this



463 calculation is only performed for the experiments with significant formation of total OA. The  
464 comparison results are discussed in the main text.

465 When comparing the mass spectra of SOA<sub>ambient</sub> with SOA<sub>lab</sub>, we note that the mass  
466 spectra of SOA<sub>ambient</sub> (when ambient NO is > 0.3ppb) generally agree better with that of  
467 SOA<sub>lab,NO2</sub> than SOA<sub>lab,HONO</sub>. This suggest that the laboratory experiment using NO<sub>2</sub>+hv as oxidant  
468 source is more representative of ambient high NO conditions than HONO+hv. This is likely due  
469 to the following reasons. Firstly, from the simple box model, we estimate that about half of  $\alpha$ -  
470 pinene reacts with OH and the other half reacts with O<sub>3</sub> in the perturbation experiments, which is  
471 similar to that in laboratory experiments with NO<sub>2</sub>+hv (Table S2). In contrast, the fate of  $\alpha$ -pinene  
472 is dominated by OH in HONO+hv experiment. Secondly, the NO<sub>x</sub> level and NO/NO<sub>2</sub> ratio in  
473 perturbation experiments are more similar to those in the NO<sub>2</sub>+hv experiment than the HONO  
474 experiment. For example, the NO/NO<sub>2</sub> ratio in  $\alpha$ -pinene perturbation experiments ranges between  
475 0.03 and 0.4, which is closer to the range in NO<sub>2</sub>+hv experiment (0.1-0.4) than in HONO  
476 experiment (0.4-0.9). Thirdly, while both perturbation experiments and NO<sub>2</sub>+hv experiment have  
477 high RH (>40%), the RH in HONO+hv experiment is <5%. However, we expect the effects of  
478 different RH on the mass spectra comparison are much smaller compared to the first two reasons.

## 479 **S8. Estimate the Fate of RO<sub>2</sub> in the Atmosphere**

480 The plateaus in Fig. 7 indicate that when NO is ~0.3ppb, RO<sub>2</sub>+NO is the dominant fate of  
481 RO<sub>2</sub>. This NO level (~0.3ppb) is consistent with the NO level required to dominate the fate of RO<sub>2</sub>,  
482 as calculated by using previously measured HO<sub>2</sub> and kinetic rate constants.

483 According to Master Chemical Mechanism (MCM v3.3) (Jenkin et al., 1997; Saunders et  
484 al., 2003), the reaction rates of RO<sub>2</sub>+NO and RO<sub>2</sub>+HO<sub>2</sub> are listed below.

$$485 \quad k_{\text{RO}_2+\text{NO}} = 2.7\text{e-}12 \times \exp(360/T) = 9.04\text{e-}12 \text{ cm}^3 \text{ molecule}^{-1} \text{ s}^{-1} \text{ (@298K)}$$

$$k_{\text{RO}_2+\text{HO}_2} = 2.91\text{e-}13 \times \exp(1300/T) = 2.28\text{e-}11 \text{ cm}^3 \text{ molecule}^{-1} \text{ s}^{-1} \text{ (@298K)}$$

486 The afternoon HO<sub>2</sub> concentration is about 5-20ppt from previous measurements at the same site  
487 during a similar period (Sanchez et al., 2016; Chen et al., 2017). Thus, when the NO concentration  
488 is about 0.1-0.5 ppb, RO<sub>2</sub>+NO would be 10 times faster than RO<sub>2</sub>+HO<sub>2</sub> and NO dominates the fate  
489 of RO<sub>2</sub>. This is similar to the estimated 0.2-0.3 ppb based on the comparison in organic mass  
490 spectra between SOA<sub>ambient</sub> and SOA<sub>lab</sub>.

491 **S9. More discussions on  $\beta$ -caryophyllene perturbation experiments.**

492 One interesting finding in  $\beta$ -caryophyllene perturbation experiments is that the LO-OOA  
493 enhancement amount is greatly affected by  $\text{NO}_2$  level. More LO-OOA is formed in perturbation  
494 experiments with a lower  $\text{NO}_2$  level (Fig. S22f), when the  $\text{O}_3$  concentration and injection time are  
495 similar. The reason for this  $\text{NO}_2$  effect on  $\beta$ -caryophyllene SOA is currently unknown. Considering  
496 that the major fate of  $\beta$ -caryophyllene in the ambient perturbation experiments is reaction with  $\text{O}_3$   
497 (i.e., lifetimes of  $\beta$ -caryophyllene with respect to 40ppb  $\text{O}_3$  and  $10^6$  molecules  $\text{cm}^{-3}$  OH are 1.5min  
498 and 80min, respectively), the  $\text{NO}_2$  effect may be related to Criegee radical, which is the most  
499 important intermediate radical in ozonolysis of alkenes. In terms of the roles of  $\text{NO}_x$  in SOA  
500 formation from  $\beta$ -caryophyllene, previous laboratory studies have mostly focused on the  $\beta$ -  
501 caryophyllene oxidation by OH (Tasoglou and Pandis, 2015) instead of oxidation by  $\text{O}_3$  (i.e., the  
502 atmospherically dominant fate of  $\beta$ -caryophyllene). Thus, the effects of  $\text{NO}_2$  on SOA formation  
503 from the ozonolysis of  $\beta$ -caryophyllene warrants future studies.

504

505

506 **Reference**

507

508 Appel, K. W., Napelenok, S. L., Foley, K. M., Pye, H. O. T., Hogrefe, C., Luecken, D. J., Bash, J.  
509 O., Roselle, S. J., Pleim, J. E., Foroutan, H., Hutzell, W. T., Pouliot, G. A., Sarwar, G., Fahey, K.  
510 M., Gantt, B., Gilliam, R. C., Heath, N. K., Kang, D., Mathur, R., Schwede, D. B., Spero, T. L.,  
511 Wong, D. C., and Young, J. O.: Description and evaluation of the Community Multiscale Air  
512 Quality (CMAQ) modeling system version 5.1, *Geosci. Model Dev.*, 10, 1703-1732,  
513 10.5194/gmd-10-1703-2017, 2017.

514

515 Bahreini, R., Keywood, M. D., Ng, N. L., Varutbangkul, V., Gao, S., Flagan, R. C., Seinfeld, J.  
516 H., Worsnop, D. R., and Jimenez, J. L.: Measurements of Secondary Organic Aerosol from  
517 Oxidation of Cycloalkenes, Terpenes, and m-Xylene Using an Aerodyne Aerosol Mass  
518 Spectrometer, *Environ Sci Technol*, 39, 5674-5688, 10.1021/es048061a, 2005.

519

520 Barsanti, K. C., Carlton, A. G., and Chung, S. H.: Analyzing experimental data and model  
521 parameters: implications for predictions of SOA using chemical transport models, *Atmos. Chem.*  
522 *Phys.*, 13, 12073-12088, 10.5194/acp-13-12073-2013, 2013.

523

524 Bougiatioti, A., Stavroulas, I., Kostenidou, E., Zarnpas, P., Theodosi, C., Kouvarakis, G.,  
525 Canonaco, F., Prévôt, A. S. H., Nenes, A., Pandis, S. N., and Mihalopoulos, N.: Processing of  
526 biomass-burning aerosol in the eastern Mediterranean during summertime, *Atmos. Chem. Phys.*,  
527 14, 4793-4807, 10.5194/acp-14-4793-2014, 2014.

528

529 Boyd, C. M., Sanchez, J., Xu, L., Eugene, A. J., Nah, T., Tuet, W. Y., Guzman, M. I., and Ng, N.  
530 L.: Secondary organic aerosol formation from the  $\beta$ -pinene+NO<sub>3</sub> system: effect of humidity and  
531 peroxy radical fate, *Atmos. Chem. Phys.*, 15, 7497-7522, 10.5194/acp-15-7497-2015, 2015.

532

533 Budisulistiorini, S. H., Canagaratna, M. R., Croteau, P. L., Marth, W. J., Baumann, K., Edgerton,  
534 E. S., Shaw, S. L., Knipping, E. M., Worsnop, D. R., Jayne, J. T., Gold, A., and Surratt, J. D.:  
535 Real-Time Continuous Characterization of Secondary Organic Aerosol Derived from Isoprene  
536 Epoxydiols in Downtown Atlanta, Georgia, Using the Aerodyne Aerosol Chemical Speciation  
537 Monitor, *Environ Sci Technol*, 47, 5686-5694, Doi 10.1021/Es400023n, 2013.

538

539 Budisulistiorini, S. H., Li, X., Bairai, S. T., Renfro, J., Liu, Y., Liu, Y. J., McKinney, K. A., Martin,  
540 S. T., McNeill, V. F., Pye, H. O. T., Nenes, A., Neff, M. E., Stone, E. A., Mueller, S., Knote, C.,  
541 Shaw, S. L., Zhang, Z., Gold, A., and Surratt, J. D.: Examining the effects of anthropogenic  
542 emissions on isoprene-derived secondary organic aerosol formation during the 2013 Southern  
543 Oxidant and Aerosol Study (SOAS) at the Look Rock, Tennessee ground site, *Atmos. Chem. Phys.*,  
544 15, 8871-8888, 10.5194/acp-15-8871-2015, 2015.

545

546 Canagaratna, M. R., Jayne, J. T., Jimenez, J. L., Allan, J. D., Alfarra, M. R., Zhang, Q., Onasch,  
547 T. B., Drewnick, F., Coe, H., Middlebrook, A., Delia, A., Williams, L. R., Trimborn, A. M.,

548 Northway, M. J., DeCarlo, P. F., Kolb, C. E., Davidovits, P., and Worsnop, D. R.: Chemical and  
549 microphysical characterization of ambient aerosols with the aerodyne aerosol mass spectrometer,  
550 *Mass Spectrometry Reviews*, 26, 185-222, 10.1002/mas.20115, 2007.  
551

552 Canagaratna, M. R., Jimenez, J. L., Kroll, J. H., Chen, Q., Kessler, S. H., Massoli, P., Hildebrandt  
553 Ruiz, L., Fortner, E., Williams, L. R., Wilson, K. R., Surratt, J. D., Donahue, N. M., Jayne, J. T.,  
554 and Worsnop, D. R.: Elemental ratio measurements of organic compounds using aerosol mass  
555 spectrometry: characterization, improved calibration, and implications, *Atmos. Chem. Phys.*, 15,  
556 253-272, 10.5194/acp-15-253-2015, 2015.  
557

558 Carlton, A. G., Bhave, P. V., Napelenok, S. L., Edney, E. O., Sarwar, G., Pinder, R. W., Pouliot,  
559 G. A., and Houyoux, M.: Model Representation of Secondary Organic Aerosol in CMAQv4.7,  
560 *Environ Sci Technol*, 44, 8553-8560, 10.1021/es100636q, 2010.  
561

562 Carlton, A. G., and Baker, K. R.: Photochemical Modeling of the Ozark Isoprene Volcano:  
563 MEGAN, BEIS, and Their Impacts on Air Quality Predictions, *Environ Sci Technol*, 45, 4438-  
564 4445, 10.1021/es200050x, 2011.  
565

566 Chan, M. N., Chan, A. W. H., Chhabra, P. S., Surratt, J. D., and Seinfeld, J. H.: Modeling of  
567 secondary organic aerosol yields from laboratory chamber data, *Atmos. Chem. Phys.*, 9, 5669-  
568 5680, 10.5194/acp-9-5669-2009, 2009.  
569

570 Chen, D., Huey, L. G., Tanner, D. J., Li, J., Ng, N. L., and Wang, Y.: Derivation of Hydroperoxyl  
571 Radical Levels at an Urban Site via Measurement of Pernitric Acid by Iodide Chemical Ionization  
572 Mass Spectrometry, *Environ Sci Technol*, 10.1021/acs.est.6b05169, 2017.  
573

574 Chen, Q., Farmer, D. K., Rizzo, L. V., Pauliquevis, T., Kuwata, M., Karl, T. G., Guenther, A.,  
575 Allan, J. D., Coe, H., Andreae, M. O., Pöschl, U., Jimenez, J. L., Artaxo, P., and Martin, S. T.:  
576 Submicron particle mass concentrations and sources in the Amazonian wet season (AMAZE-08),  
577 *Atmos. Chem. Phys.*, 15, 3687-3701, 10.5194/acp-15-3687-2015, 2015.  
578

579 Crippa, M., Canonaco, F., Lanz, V. A., Äijälä, M., Allan, J. D., Carbone, S., Capes, G., Ceburnis,  
580 D., Dall'Osto, M., Day, D. A., DeCarlo, P. F., Ehn, M., Eriksson, A., Freney, E., Hildebrandt Ruiz,  
581 L., Hillamo, R., Jimenez, J. L., Junninen, H., Kiendler-Scharr, A., Kortelainen, A. M., Kulmala,  
582 M., Laaksonen, A., Mensah, A. A., Mohr, C., Nemitz, E., O'Dowd, C., Ovadnevaite, J., Pandis, S.  
583 N., Petäjä, T., Poulain, L., Saarikoski, S., Sellegri, K., Swietlicki, E., Tiitta, P., Worsnop, D. R.,  
584 Baltensperger, U., and Prévôt, A. S. H.: Organic aerosol components derived from 25 AMS data  
585 sets across Europe using a consistent ME-2 based source apportionment approach, *Atmos. Chem.*  
586 *Phys.*, 14, 6159-6176, 10.5194/acp-14-6159-2014, 2014.  
587

588 de Sá, S. S., Palm, B. B., Campuzano-Jost, P., Day, D. A., Newburn, M. K., Hu, W., Isaacman-  
589 VanWertz, G., Yee, L. D., Thalman, R., Brito, J., Carbone, S., Artaxo, P., Goldstein, A. H., Manzi,  
590 A. O., Souza, R. A. F., Mei, F., Shilling, J. E., Springston, S. R., Wang, J., Surratt, J. D., Alexander,

591 M. L., Jimenez, J. L., and Martin, S. T.: Influence of urban pollution on the production of organic  
592 particulate matter from isoprene epoxydiols in central Amazonia, *Atmos. Chem. Phys. Discuss.*,  
593 2016, 1-58, 10.5194/acp-2016-1020, 2016.  
594

595 de Sá, S. S., Palm, B. B., Campuzano-Jost, P., Day, D. A., Newburn, M. K., Hu, W., Isaacman-  
596 VanWertz, G., Yee, L. D., Thalman, R., Brito, J., Carbone, S., Artaxo, P., Goldstein, A. H., Manzi,  
597 A. O., Souza, R. A. F., Mei, F., Shilling, J. E., Springston, S. R., Wang, J., Surratt, J. D., Alexander,  
598 M. L., Jimenez, J. L., and Martin, S. T.: Influence of urban pollution on the production of organic  
599 particulate matter from isoprene epoxydiols in central Amazonia, *Atmos. Chem. Phys.*, 17, 6611-  
600 6629, 10.5194/acp-17-6611-2017, 2017.  
601

602 DeCarlo, P. F., Kimmel, J. R., Trimborn, A., Northway, M. J., Jayne, J. T., Aiken, A. C., Gonin,  
603 M., Fuhrer, K., Horvath, T., Docherty, K. S., Worsnop, D. R., and Jimenez, J. L.: Field-Deployable,  
604 High-Resolution, Time-of-Flight Aerosol Mass Spectrometer, *Anal Chem*, 78, 8281-8289,  
605 10.1021/ac061249n, 2006.  
606

607 Donahue, N. M., Epstein, S. A., Pandis, S. N., and Robinson, A. L.: A two-dimensional volatility  
608 basis set: 1. organic-aerosol mixing thermodynamics, *Atmos. Chem. Phys.*, 11, 3303-3318,  
609 10.5194/acp-11-3303-2011, 2011.  
610

611 Ehn, M., Thornton, J. A., Kleist, E., Sipila, M., Junninen, H., Pullinen, I., Springer, M., Rubach,  
612 F., Tillmann, R., Lee, B., Lopez-Hilfiker, F., Andres, S., Acir, I.-H., Rissanen, M., Jokinen, T.,  
613 Schobesberger, S., Kangasluoma, J., Kontkanen, J., Nieminen, T., Kurten, T., Nielsen, L. B.,  
614 Jorgensen, S., Kjaergaard, H. G., Canagaratna, M., Maso, M. D., Berndt, T., Petaja, T., Wahner,  
615 A., Kerminen, V.-M., Kulmala, M., Worsnop, D. R., Wildt, J., and Mentel, T. F.: A large source  
616 of low-volatility secondary organic aerosol, *Nature*, 506, 476-479, 10.1038/nature13032, 2014.  
617

618 Epstein, S. A., Riipinen, I., and Donahue, N. M.: A Semiempirical Correlation between Enthalpy  
619 of Vaporization and Saturation Concentration for Organic Aerosol, *Environ Sci Technol*, 44, 743-  
620 748, Doi 10.1021/Es902497z, 2010.  
621

622 Fry, J. L., Draper, D. C., Barsanti, K. C., Smith, J. N., Ortega, J., Winkler, P. M., Lawler, M. J.,  
623 Brown, S. S., Edwards, P. M., Cohen, R. C., and Lee, L.: Secondary Organic Aerosol Formation  
624 and Organic Nitrate Yield from NO<sub>3</sub> Oxidation of Biogenic Hydrocarbons, *Environ Sci Technol*,  
625 48, 11944-11953, 10.1021/es502204x, 2014.  
626

627 Griffin, R. J., Cocker, D. R., Flagan, R. C., and Seinfeld, J. H.: Organic aerosol formation from  
628 the oxidation of biogenic hydrocarbons, *J Geophys Res-Atmos*, 104, 3555-3567, Doi  
629 10.1029/1998jd100049, 1999.  
630

631 Guenther, A., Jiang, X., Heald, C. L., Sakulyanontvittaya, T., Duhl, T., Emmons, L. K., and Wang,  
632 X.: The Model of Emissions of Gases and Aerosols from Nature version 2.1 (MEGAN2.1): an

633 extended and updated framework for modeling biogenic emissions, *Geosci. Model Dev.*, 5, 1471-  
634 1492, 10.5194/gmd-5-1471-2012, 2012.  
635

636 Heath, N. K., Pleim, J. E., Gilliam, R. C., and Kang, D.: A simple lightning assimilation technique  
637 for improving retrospective WRF simulations, *Journal of Advances in Modeling Earth Systems*, 8,  
638 1806-1824, 10.1002/2016MS000735, 2016.  
639

640 Helmig, D., Ortega, J., Duhl, T., Tanner, D., Guenther, A., Harley, P., Wiedinmyer, C., Milford,  
641 J., and Sakulyanontvittaya, T.: Sesquiterpene Emissions from Pine Trees – Identifications,  
642 Emission Rates and Flux Estimates for the Contiguous United States, *Environ Sci Technol*, 41,  
643 1545-1553, 10.1021/es0618907, 2007.  
644

645 Hodzic, A., Aumont, B., Knote, C., Lee-Taylor, J., Madronich, S., and Tyndall, G.: Volatility  
646 dependence of Henry's law constants of condensable organics: Application to estimate  
647 depositional loss of secondary organic aerosols, *Geophysical Research Letters*, 41, 4795-4804,  
648 10.1002/2014GL060649, 2014.  
649

650 Hu, W. W., Campuzano-Jost, P., Palm, B. B., Day, D. A., Ortega, A. M., Hayes, P. L., Krechmer,  
651 J. E., Chen, Q., Kuwata, M., Liu, Y. J., de Sá, S. S., McKinney, K., Martin, S. T., Hu, M.,  
652 Budisulistiorini, S. H., Riva, M., Surratt, J. D., St. Clair, J. M., Isaacman-Van Wertz, G., Yee, L.  
653 D., Goldstein, A. H., Carbone, S., Brito, J., Artaxo, P., de Gouw, J. A., Koss, A., Wisthaler, A.,  
654 Mikoviny, T., Karl, T., Kaser, L., Jud, W., Hansel, A., Docherty, K. S., Alexander, M. L., Robinson,  
655 N. H., Coe, H., Allan, J. D., Canagaratna, M. R., Paulot, F., and Jimenez, J. L.: Characterization  
656 of a real-time tracer for isoprene epoxydiols-derived secondary organic aerosol (IEPOX-SOA)  
657 from aerosol mass spectrometer measurements, *Atmos. Chem. Phys.*, 15, 11807-11833,  
658 10.5194/acp-15-11807-2015, 2015.  
659

660 Huang, X. F., He, L. Y., Hu, M., Canagaratna, M. R., Sun, Y., Zhang, Q., Zhu, T., Xue, L., Zeng,  
661 L. W., Liu, X. G., Zhang, Y. H., Jayne, J. T., Ng, N. L., and Worsnop, D. R.: Highly time-resolved  
662 chemical characterization of atmospheric submicron particles during 2008 Beijing Olympic  
663 Games using an Aerodyne High-Resolution Aerosol Mass Spectrometer, *Atmos Chem Phys*, 10,  
664 8933-8945, DOI 10.5194/acp-10-8933-2010, 2010.  
665

666 Jacobs, M. I., Burke, W. J., and Elrod, M. J.: Kinetics of the reactions of isoprene-derived  
667 hydroxynitrates: gas phase epoxide formation and solution phase hydrolysis, *Atmos. Chem. Phys.*,  
668 14, 8933-8946, 10.5194/acp-14-8933-2014, 2014.  
669

670 Jenkin, M. E., Saunders, S. M., and Pilling, M. J.: The tropospheric degradation of volatile organic  
671 compounds: a protocol for mechanism development, *Atmospheric Environment*, 31, 81-104,  
672 [http://dx.doi.org/10.1016/S1352-2310\(96\)00105-7](http://dx.doi.org/10.1016/S1352-2310(96)00105-7), 1997.  
673

674 Jimenez, J. L., Canagaratna, M. R., Donahue, N. M., Prevot, A. S. H., Zhang, Q., Kroll, J. H.,  
675 DeCarlo, P. F., Allan, J. D., Coe, H., Ng, N. L., Aiken, A. C., Docherty, K. S., Ulbrich, I. M.,

676 Grieshop, A. P., Robinson, A. L., Duplissy, J., Smith, J. D., Wilson, K. R., Lanz, V. A., Hueglin,  
677 C., Sun, Y. L., Tian, J., Laaksonen, A., Raatikainen, T., Rautiainen, J., Vaattovaara, P., Ehn, M.,  
678 Kulmala, M., Tomlinson, J. M., Collins, D. R., Cubison, M. J., Dunlea, E. J., Huffman, J. A.,  
679 Onasch, T. B., Alfarra, M. R., Williams, P. I., Bower, K., Kondo, Y., Schneider, J., Drewnick, F.,  
680 Borrmann, S., Weimer, S., Demerjian, K., Salcedo, D., Cottrell, L., Griffin, R., Takami, A.,  
681 Miyoshi, T., Hatakeyama, S., Shimono, A., Sun, J. Y., Zhang, Y. M., Dzepina, K., Kimmel, J. R.,  
682 Sueper, D., Jayne, J. T., Herndon, S. C., Trimborn, A. M., Williams, L. R., Wood, E. C.,  
683 Middlebrook, A. M., Kolb, C. E., Baltensperger, U., and Worsnop, D. R.: Evolution of Organic  
684 Aerosols in the Atmosphere, *Science*, 326, 1525-1529, DOI 10.1126/science.1180353, 2009.  
685

686 Keywood, M. D., Varutbangkul, V., Bahreini, R., Flagan, R. C., and Seinfeld, J. H.: Secondary  
687 organic aerosol formation from the ozonolysis of cycloalkenes and related compounds, *Environ*  
688 *Sci Technol*, 38, 4157-4164, Doi 10.1021/Es.035363o, 2004.  
689

690 Kroll, J. H., Ng, N. L., Murphy, S. M., Flagan, R. C., and Seinfeld, J. H.: Secondary organic aerosol  
691 formation from isoprene photooxidation, *Environ Sci Technol*, 40, 1869-1877, Doi  
692 10.1021/Es0524301, 2006.  
693

694 Lin, Y. H., Zhang, Z. F., Docherty, K. S., Zhang, H. F., Budisulistiorini, S. H., Rubitschun, C. L.,  
695 Shaw, S. L., Knipping, E. M., Edgerton, E. S., Kleindienst, T. E., Gold, A., and Surratt, J. D.:  
696 Isoprene Epoxydiols as Precursors to Secondary Organic Aerosol Formation: Acid-Catalyzed  
697 Reactive Uptake Studies with Authentic Compounds, *Environ Sci Technol*, 46, 250-258, Doi  
698 10.1021/Es202554c, 2012.  
699

700 Liu, S., Aiken, A. C., Gorkowski, K., Dubey, M. K., Cappa, C. D., Williams, L. R., Herndon, S.  
701 C., Massoli, P., Fortner, E. C., Chhabra, P. S., Brooks, W. A., Onasch, T. B., Jayne, J. T., Worsnop,  
702 D. R., China, S., Sharma, N., Mazzoleni, C., Xu, L., Ng, N. L., Liu, D., Allan, J. D., Lee, J. D.,  
703 Fleming, Z. L., Mohr, C., Zotter, P., Szidat, S., and Prevot, A. S. H.: Enhanced light absorption by  
704 mixed source black and brown carbon particles in UK winter, *Nat Commun*, 6,  
705 10.1038/ncomms9435, 2015.  
706

707 Matthew, B. M., Middlebrook, A. M., and Onasch, T. B.: Collection efficiencies in an Aerodyne  
708 Aerosol Mass Spectrometer as a function of particle phase for laboratory generated aerosols,  
709 *Aerosol Sci Tech*, 42, 884-898, Doi 10.1080/02786820802356797, 2008.  
710

711 Middlebrook, A. M., Bahreini, R., Jimenez, J. L., and Canagaratna, M. R.: Evaluation of  
712 Composition-Dependent Collection Efficiencies for the Aerodyne Aerosol Mass Spectrometer  
713 using Field Data, *Aerosol Sci Tech*, 46, 258-271, Doi 10.1080/02786826.2011.620041, 2012.  
714

715 Milic, A., Mallet, M. D., Cravigan, L. T., Alroe, J., Ristovski, Z. D., Selleck, P., Lawson, S. J.,  
716 Ward, J., Desservettaz, M. J., Paton-Walsh, C., Williams, L. R., Keywood, M. D., and Miljevic,  
717 B.: Biomass burning and biogenic aerosols in northern Australia during the SAFIRED campaign,  
718 *Atmos. Chem. Phys.*, 17, 3945-3961, 10.5194/acp-17-3945-2017, 2017.

719

720 Mohr, C., Huffman, J. A., Cubison, M. J., Aiken, A. C., Docherty, K. S., Kimmel, J. R., Ulbrich,  
721 I. M., Hannigan, M., and Jimenez, J. L.: Characterization of Primary Organic Aerosol Emissions  
722 from Meat Cooking, Trash Burning, and Motor Vehicles with High-Resolution Aerosol Mass  
723 Spectrometry and Comparison with Ambient and Chamber Observations, *Environ Sci Technol*,  
724 43, 2443-2449, 10.1021/es8011518, 2009.

725

726 Murphy, B. N., Woody, M. C., Jimenez, J. L., Carlton, A. M. G., Hayes, P. L., Liu, S., Ng, N. L.,  
727 Russell, L. M., Setyan, A., Xu, L., Young, J., Zaveri, R. A., Zhang, Q., and Pye, H. O. T.:  
728 Semivolatile POA and parameterized total combustion SOA in CMAQv5.2: impacts on source  
729 strength and partitioning, *Atmos. Chem. Phys.*, 17, 11107-11133, 10.5194/acp-17-11107-2017,  
730 2017a.

731

732 Murphy, B. N., Woody, M. C., Jimenez, J. L., Carlton, A. M. G., Hayes, P. L., Liu, S., Ng, N. L.,  
733 Russell, L. M., Setyan, A., Xu, L., Young, J., Zaveri, R. A., Zhang, Q., and Pye, H. O. T.:  
734 Semivolatile POA and parameterized total combustion SOA in CMAQv5.2: impacts on source  
735 strength and partitioning, *Atmos. Chem. Phys. Discuss.*, 2017, 1-44, 10.5194/acp-2017-193, 2017b.

736

737 Nah, T., McVay, R. C., Zhang, X., Boyd, C. M., Seinfeld, J. H., and Ng, N. L.: Influence of seed  
738 aerosol surface area and oxidation rate on vapor wall deposition and SOA mass yields: a case study  
739 with  $\alpha$ -pinene ozonolysis, *Atmos. Chem. Phys.*, 16, 9361-9379, 10.5194/acp-16-9361-2016, 2016.

740

741 Ng, N. L., Kroll, J. H., Chan, A. W. H., Chhabra, P. S., Flagan, R. C., and Seinfeld, J. H.: Secondary  
742 organic aerosol formation from m-xylene, toluene, and benzene, *Atmos. Chem. Phys.*, 7, 3909-  
743 3922, 10.5194/acp-7-3909-2007, 2007.

744

745 Ng, N. L., Canagaratna, M. R., Zhang, Q., Jimenez, J. L., Tian, J., Ulbrich, I. M., Kroll, J. H.,  
746 Docherty, K. S., Chhabra, P. S., Bahreini, R., Murphy, S. M., Seinfeld, J. H., Hildebrandt, L.,  
747 Donahue, N. M., DeCarlo, P. F., Lanz, V. A., Prevot, A. S. H., Dinar, E., Rudich, Y., and Worsnop,  
748 D. R.: Organic aerosol components observed in Northern Hemispheric datasets from Aerosol Mass  
749 Spectrometry, *Atmos Chem Phys*, 10, 4625-4641, DOI 10.5194/acp-10-4625-2010, 2010.

750

751 Nolte, C. G., Appel, K. W., Kelly, J. T., Bhave, P. V., Fahey, K. M., Collett Jr, J. L., Zhang, L.,  
752 and Young, J. O.: Evaluation of the Community Multiscale Air Quality (CMAQ) model v5.0  
753 against size-resolved measurements of inorganic particle composition across sites in North  
754 America, *Geosci. Model Dev.*, 8, 2877-2892, 10.5194/gmd-8-2877-2015, 2015.

755

756 Odum, J. R., Hoffmann, T., Bowman, F., Collins, D., Flagan, R. C., and Seinfeld, J. H.:  
757 Gas/Particle Partitioning and Secondary Organic Aerosol Yields, *Environ Sci Technol*, 30, 2580-  
758 2585, 10.1021/es950943+, 1996.

759



760 Paatero, P., and Tapper, U.: Positive Matrix Factorization - a Nonnegative Factor Model with  
761 Optimal Utilization of Error-Estimates of Data Values, *Environmetrics*, 5, 111-126, DOI  
762 10.1002/env.3170050203, 1994.  
763

764 Palm, B. B., de Sá, S. S., Day, D. A., Campuzano-Jost, P., Hu, W., Seco, R., Sjostedt, S. J., Park,  
765 J. H., Guenther, A. B., Kim, S., Brito, J., Wurm, F., Artaxo, P., Thalman, R., Wang, J., Yee, L. D.,  
766 Wernis, R., Isaacman-VanWertz, G., Goldstein, A. H., Liu, Y., Springston, S. R., Souza, R.,  
767 Newburn, M. K., Alexander, M. L., Martin, S. T., and Jimenez, J. L.: Secondary organic aerosol  
768 formation from ambient air in an oxidation flow reactor in central Amazonia, *Atmos. Chem. Phys.*  
769 *Discuss.*, 2017, 1-56, 10.5194/acp-2017-795, 2017.  
770

771 Pathak, R. K., Stanier, C. O., Donahue, N. M., and Pandis, S. N.: Ozonolysis of alpha-pinene at  
772 atmospherically relevant concentrations: Temperature dependence of aerosol mass fractions  
773 (yields), *J Geophys Res-Atmos*, 112, Artn D03201  
774 Doi 10.1029/2006jd007436, 2007.  
775

776 Pye, H. O. T., Luecken, D. J., Xu, L., Boyd, C. M., Ng, N. L., Baker, K. R., Ayres, B. R., Bash, J.  
777 O., Baumann, K., Carter, W. P. L., Edgerton, E., Fry, J. L., Hutzell, W. T., Schwede, D. B., and  
778 Shepson, P. B.: Modeling the Current and Future Roles of Particulate Organic Nitrates in the  
779 Southeastern United States, *Environ Sci Technol*, 49, 14195-14203, 10.1021/acs.est.5b03738,  
780 2015.  
781

782 Pye, H. O. T., Murphy, B. N., Xu, L., Ng, N. L., Carlton, A. G., Guo, H., Weber, R., Vasilakos,  
783 P., Appel, K. W., Budisulistiorini, S. H., Surratt, J. D., Nenes, A., Hu, W., Jimenez, J. L., Isaacman-  
784 VanWertz, G., Misztal, P. K., and Goldstein, A. H.: On the implications of aerosol liquid water  
785 and phase separation for organic aerosol mass, *Atmos. Chem. Phys.*, 17, 343-369, 10.5194/acp-  
786 17-343-2017, 2017.  
787

788 Reyes-Villegas, E., Priestley, M., Ting, Y. C., Haslett, S., Bannan, T., Le Breton, M., Williams, P.  
789 I., Bacak, A., Flynn, M. J., Coe, H., Percival, C., and Allan, J. D.: Simultaneous aerosol mass  
790 spectrometry and chemical ionisation mass spectrometry measurements during a biomass burning  
791 event in the UK: insights into nitrate chemistry, *Atmos. Chem. Phys.*, 18, 4093-4111, 10.5194/acp-  
792 18-4093-2018, 2018.  
793

794 Rindelaub, J. D., Borca, C. H., Hostetler, M. A., Slade, J. H., Lipton, M. A., Slipchenko, L. V.,  
795 and Shepson, P. B.: The acid-catalyzed hydrolysis of an  $\alpha$ -pinene-derived organic nitrate: kinetics,  
796 products, reaction mechanisms, and atmospheric impact, *Atmos. Chem. Phys.*, 16, 15425-15432,  
797 10.5194/acp-16-15425-2016, 2016.  
798

799 Robinson, N. H., Hamilton, J. F., Allan, J. D., Langford, B., Oram, D. E., Chen, Q., Docherty, K.,  
800 Farmer, D. K., Jimenez, J. L., Ward, M. W., Hewitt, C. N., Barley, M. H., Jenkin, M. E., Rickard,  
801 A. R., Martin, S. T., McFiggans, G., and Coe, H.: Evidence for a significant proportion of

802 Secondary Organic Aerosol from isoprene above a maritime tropical forest, *Atmos Chem Phys*,  
803 11, 1039-1050, DOI 10.5194/acp-11-1039-2011, 2011.  
804

805 Saha, P. K., and Grieshop, A. P.: Exploring Divergent Volatility Properties from Yield and  
806 Thermodenuder Measurements of Secondary Organic Aerosol from  $\alpha$ -Pinene Ozonolysis, *Environ*  
807 *Sci Technol*, 10.1021/acs.est.6b00303, 2016.  
808

809 Sanchez, J., Tanner, D. J., Chen, D., Huey, L. G., and Ng, N. L.: A new technique for the direct  
810 detection of HO<sub>2</sub> radicals using bromide chemical ionization mass spectrometry (Br-CIMS): initial  
811 characterization, *Atmos. Meas. Tech.*, 9, 3851-3861, 10.5194/amt-9-3851-2016, 2016.  
812

813 Saunders, S. M., Jenkin, M. E., Derwent, R. G., and Pilling, M. J.: Protocol for the development  
814 of the Master Chemical Mechanism, MCM v3 (Part A): tropospheric degradation of non-aromatic  
815 volatile organic compounds, *Atmos Chem Phys*, 3, 161-180, 2003.  
816

817 Shilling, J. E., Chen, Q., King, S. M., Rosenoern, T., Kroll, J. H., Worsnop, D. R., McKinney, K.  
818 A., and Martin, S. T.: Particle mass yield in secondary organic aerosol formed by the dark  
819 ozonolysis of alpha-pinene, *Atmos Chem Phys*, 8, 2073-2088, 2008.  
820

821 Sun, Y., Du, W., Fu, P., Wang, Q., Li, J., Ge, X., Zhang, Q., Zhu, C., Ren, L., Xu, W., Zhao, J.,  
822 Han, T., Worsnop, D. R., and Wang, Z.: Primary and secondary aerosols in Beijing in winter:  
823 sources, variations and processes, *Atmos. Chem. Phys.*, 16, 8309-8329, 10.5194/acp-16-8309-  
824 2016, 2016.  
825

826 Tasoglou, A., and Pandis, S. N.: Formation and chemical aging of secondary organic aerosol  
827 during the  $\beta$ -caryophyllene oxidation, *Atmos. Chem. Phys.*, 15, 6035-6046, 10.5194/acp-15-6035-  
828 2015, 2015.  
829

830 Tuet, W. Y., Chen, Y., Xu, L., Fok, S., Gao, D., Weber, R. J., and Ng, N. L.: Chemical oxidative  
831 potential of secondary organic aerosol (SOA) generated from the photooxidation of biogenic and  
832 anthropogenic volatile organic compounds, *Atmos. Chem. Phys.*, 17, 839-853, 10.5194/acp-17-  
833 839-2017, 2017.  
834

835 Ulbrich, I. M., Canagaratna, M. R., Zhang, Q., Worsnop, D. R., and Jimenez, J. L.: Interpretation  
836 of organic components from Positive Matrix Factorization of aerosol mass spectrometric data,  
837 *Atmos. Chem. Phys.*, 9, 2891-2918, 2009a.  
838

839 Ulbrich, I. M., Canagaratna, M. R., Zhang, Q., Worsnop, D. R., and Jimenez, J. L.: Interpretation  
840 of organic components from Positive Matrix Factorization of aerosol mass spectrometric data,  
841 *Atmos. Chem. Phys.*, 9, 2891-2918, 10.5194/acp-9-2891-2009, 2009b.  
842

843 Vaden, T. D., Imre, D., Beránek, J., Shrivastava, M., and Zelenyuk, A.: Evaporation kinetics and  
844 phase of laboratory and ambient secondary organic aerosol, *Proceedings of the National Academy*  
845 *of Sciences*, 108, 2190-2195, 10.1073/pnas.1013391108, 2011.

846

847 Xu, L., Kollman, M. S., Song, C., Shilling, J. E., and Ng, N. L.: Effects of NO<sub>x</sub> on the Volatility  
848 of Secondary Organic Aerosol from Isoprene Photooxidation, *Environ Sci Technol*, 48, 2253-2262,  
849 10.1021/es404842g, 2014.

850

851 Xu, L., Guo, H., Boyd, C. M., Klein, M., Bougiatioti, A., Cerully, K. M., Hite, J. R., Isaacman-  
852 VanWertz, G., Kreisberg, N. M., Knote, C., Olson, K., Koss, A., Goldstein, A. H., Hering, S. V.,  
853 de Gouw, J., Baumann, K., Lee, S.-H., Nenes, A., Weber, R. J., and Ng, N. L.: Effects of  
854 anthropogenic emissions on aerosol formation from isoprene and monoterpenes in the southeastern  
855 United States, *Proceedings of the National Academy of Sciences*, 112, 37-42,  
856 10.1073/pnas.1417609112, 2015a.

857

858 Xu, L., Suresh, S., Guo, H., Weber, R. J., and Ng, N. L.: Aerosol characterization over the  
859 southeastern United States using high-resolution aerosol mass spectrometry: spatial and seasonal  
860 variation of aerosol composition and sources with a focus on organic nitrates, *Atmos. Chem. Phys.*,  
861 15, 7307-7336, 10.5194/acp-15-7307-2015, 2015b.

862

863 Xu, L., Guo, H., Weber, R. J., and Ng, N. L.: Chemical Characterization of Water-Soluble Organic  
864 Aerosol in Contrasting Rural and Urban Environments in the Southeastern United States, *Environ*  
865 *Sci Technol*, 51, 78-88, 10.1021/acs.est.6b05002, 2017.

866

867 Xu, W., Han, T., Du, W., Wang, Q., Chen, C., Zhao, J., Zhang, Y., Li, J., Fu, P., Wang, Z.,  
868 Worsnop, D. R., and Sun, Y.: Effects of Aqueous-Phase and Photochemical Processing on  
869 Secondary Organic Aerosol Formation and Evolution in Beijing, China, *Environ Sci Technol*,  
870 10.1021/acs.est.6b04498, 2016.

871

872 Yu, J., Cocker, D. R., Griffin, R. J., Flagan, R. C., and Seinfeld, J. H.: Gas-Phase Ozone Oxidation  
873 of Monoterpenes: Gaseous and Particulate Products, *J Atmos Chem*, 34, 207-258,  
874 10.1023/a:1006254930583, 1999.

875

876 Yu, L., Smith, J., Laskin, A., Anastasio, C., Laskin, J., and Zhang, Q.: Chemical characterization  
877 of SOA formed from aqueous-phase reactions of phenols with the triplet excited state of carbonyl  
878 and hydroxyl radical, *Atmos. Chem. Phys.*, 14, 13801-13816, 10.5194/acp-14-13801-2014, 2014.

879

880 Zhang, Q., Jimenez, J. L., Canagaratna, M. R., Ulbrich, I. M., Ng, N. L., Worsnop, D. R., and Sun,  
881 Y. L.: Understanding atmospheric organic aerosols via factor analysis of aerosol mass  
882 spectrometry: a review, *Anal Bioanal Chem*, 401, 3045-3067, DOI 10.1007/s00216-011-5355-y,  
883 2011.

884

885 Zhang, X., McVay, R. C., Huang, D. D., Dalleska, N. F., Aumont, B., Flagan, R. C., and Seinfeld,  
886 J. H.: Formation and evolution of molecular products in  $\alpha$ -pinene secondary organic aerosol,  
887 Proceedings of the National Academy of Sciences, 112, 14168-14173, 10.1073/pnas.1517742112,  
888 2015.

889  
890 Zhang, Y., Tang, L., Croteau, P. L., Favez, O., Sun, Y., Canagaratna, M. R., Wang, Z., Couvidat,  
891 F., Albinet, A., Zhang, H., Sciare, J., Prévôt, A. S. H., Jayne, J. T., and Worsnop, D. R.: Field  
892 characterization of the PM<sub>2.5</sub> Aerosol Chemical Speciation Monitor: insights into the composition,  
893 sources and processes of fine particles in Eastern China, Atmos. Chem. Phys. Discuss., 2017, 1-  
894 52, 10.5194/acp-2017-233, 2017.

895

896

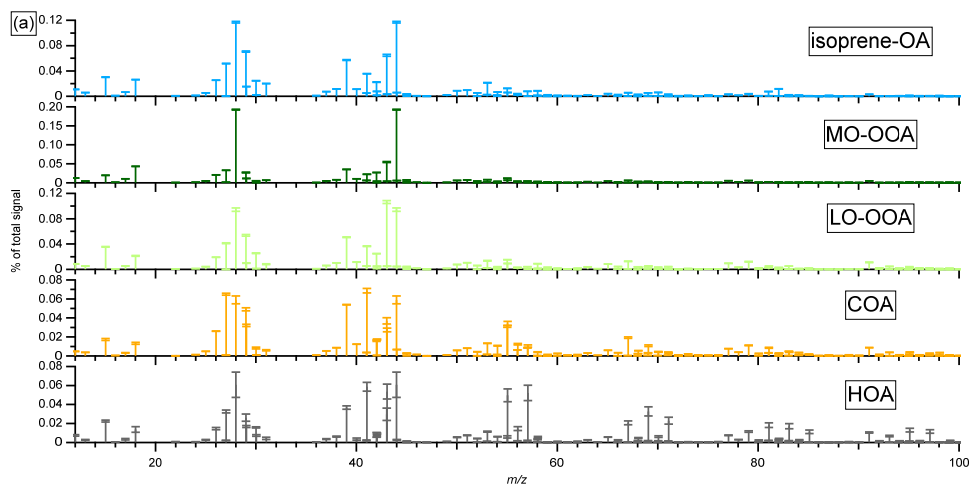

897

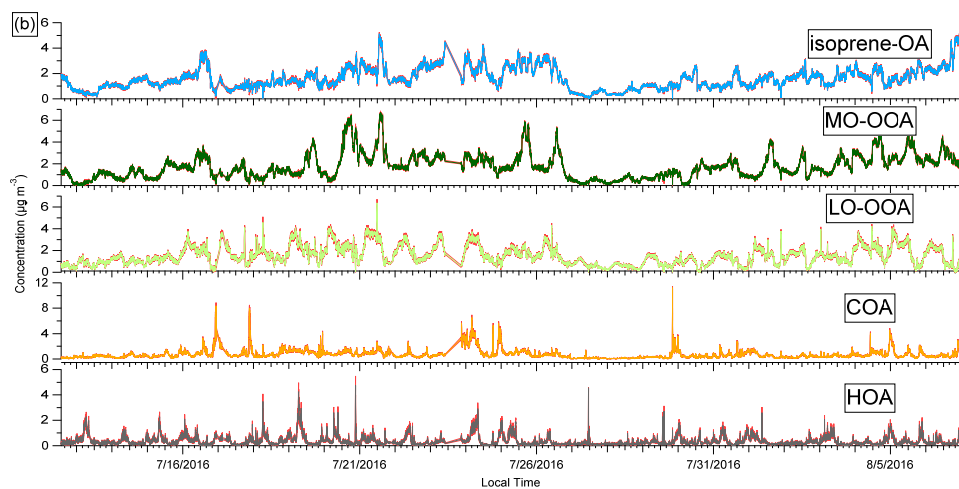

898

899 Fig. S1. PMF results from bootstrapping analysis. (a) Average mass spectra (sticks) with 1- $\sigma$  error  
 900 bars (caps). (b) Average time series and 1- $\sigma$  error bars (red).

901

902

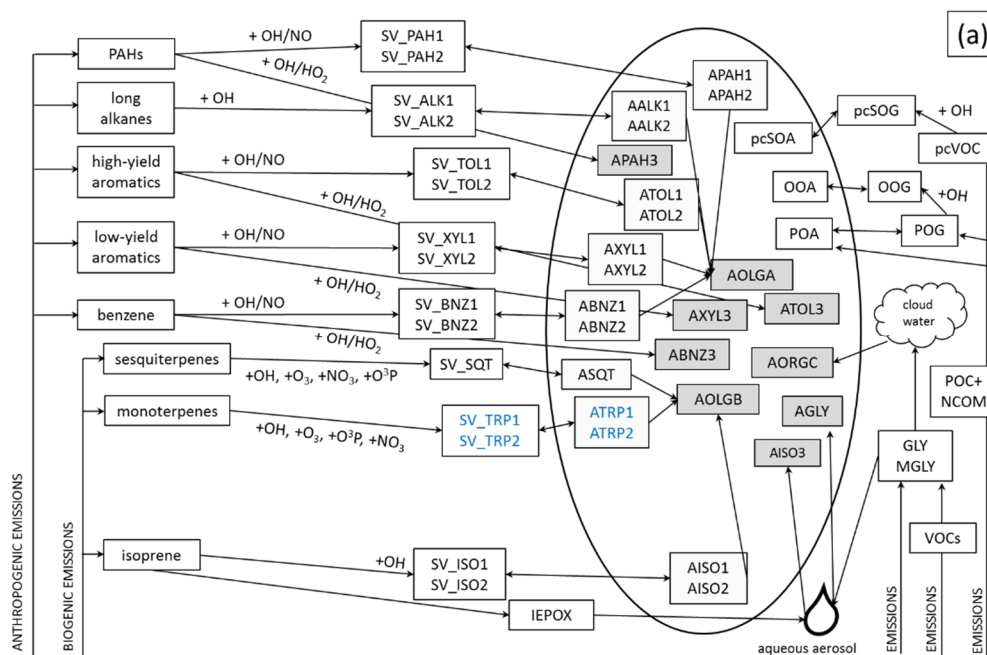

903

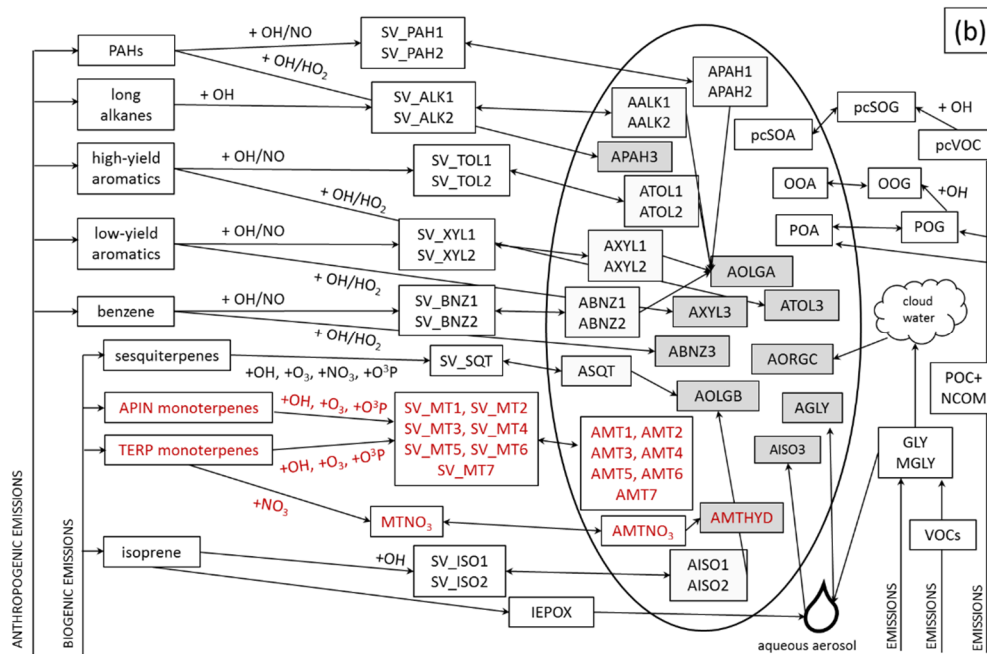

904 Fig. S2. Schematic of SOA treatment in (a) default simulation (v5.2) and (b) updated simulation  
 905 in CMAQ. See Pye et al. (2017) for a description of the traditional and aqueous aerosol SOA  
 906 systems. See Murphy et al. (2017) for a description of the semivolatile POA (POA, POG), oxidized  
 907 POA vapors (OOA, OOG) and potential SOA from combustion sources (pcSOA) system. See Pye  
 908 et al. (2015) for MTNO<sub>3</sub> formation and hydrolysis. In the default simulation, species in blue were  
 909 not formed in the updated simulation. In the updated simulation, species in red are different from  
 910 the default simulation.

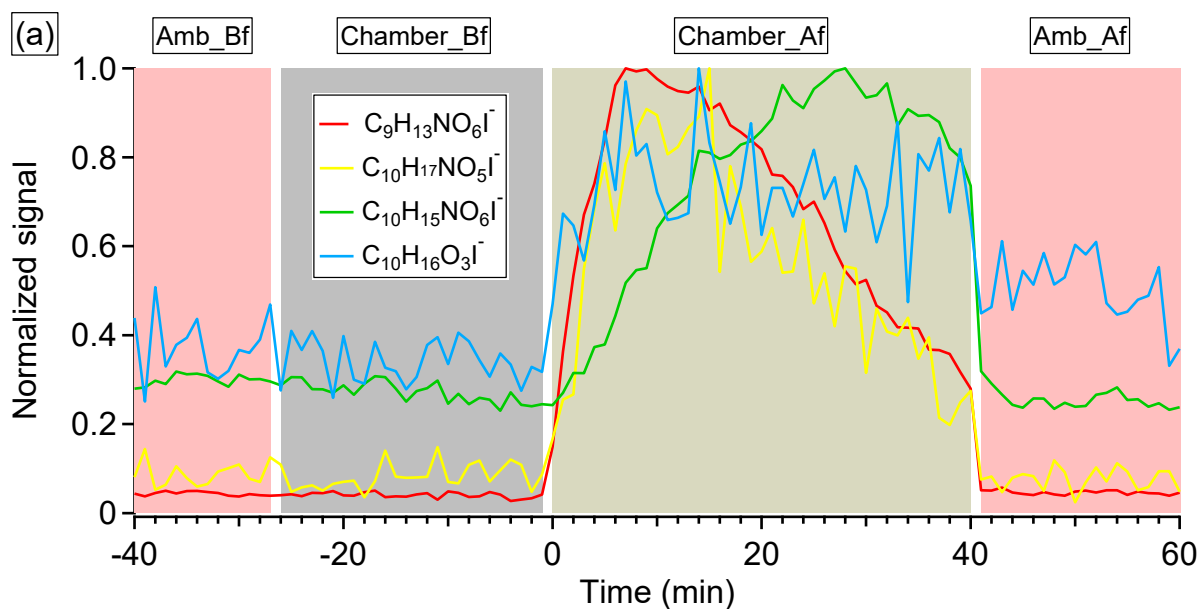

911

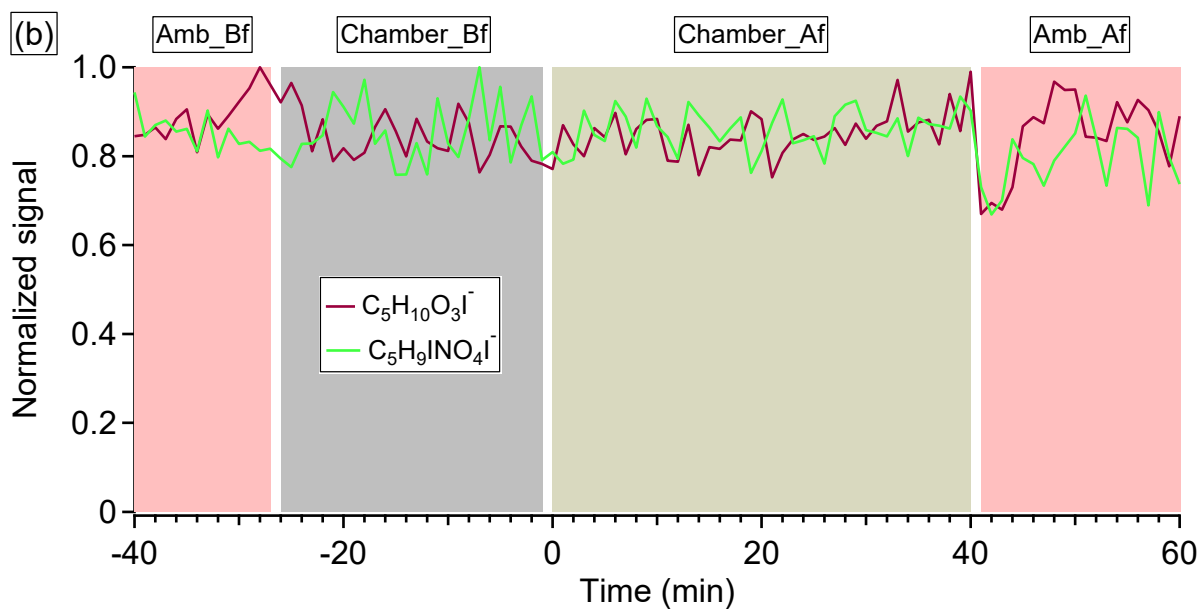

912

913 Fig. S3. Time series of gas-phase species detected by HR-ToF-CIMS using  $I^-$  as reagent ion in  
 914 experiment ap\_0718\_1. Panel (a) includes four major known  $\alpha$ -pinene oxidation products. Panel  
 915 (b) includes two major known isoprene oxidation products. The signal is normalized to  $I^-$  and then  
 916 normalized to the maximum signal in the time window shown in the figure.

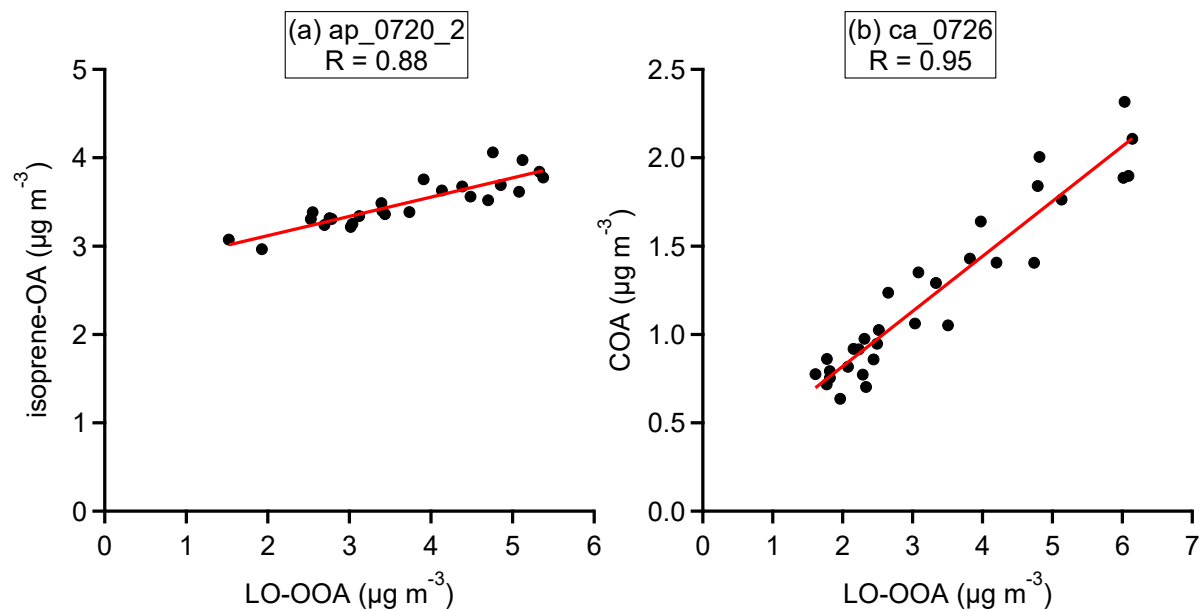

917

918 Fig. S4. (a) The correlation between isoprene-OA and LO-OOA in the “Chamber\_Af” period of  
919 one  $\alpha$ -pinene perturbation experiment (i.e., ap\_0720\_2). (b) The correlation between COA and  
920 LO-OOA in the “Chamber\_Af” period of one  $\beta$ -caryophyllene experiment (i.e., ca\_0726).

921



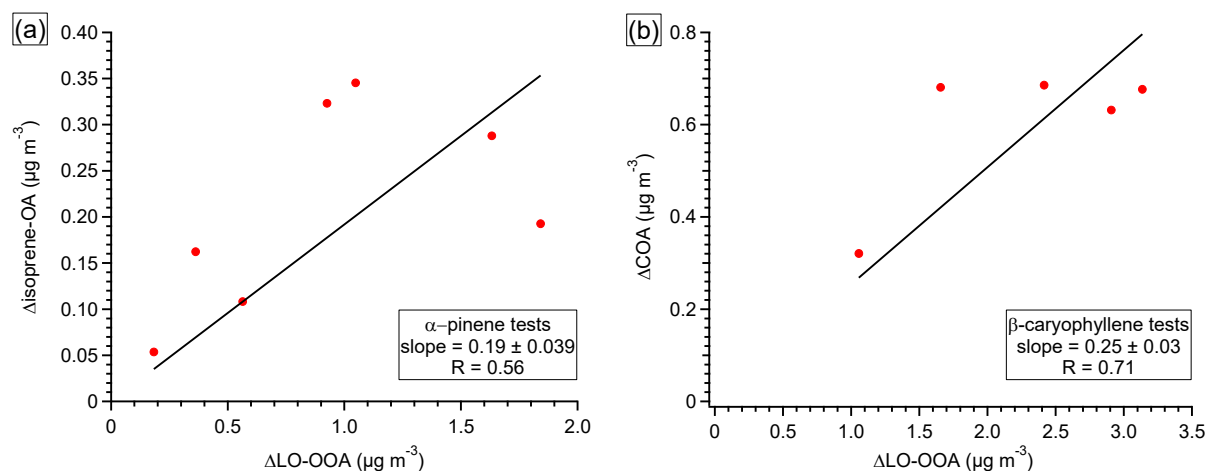

922  
 923 Fig. S5. (a) The relationship between isoprene-OA enhancement and LO-OOA enhancement in  $\alpha$ -  
 924 pinene perturbation experiments. (b) The relationship between COA enhancement and LO-OOA  
 925 enhancement in  $\beta$ -caryophyllene perturbation experiments. The slopes are from orthogonal fit. The  
 926 R is from least square fit. The intercepts are forced to be zero. In  $\alpha$ -pinene experiments, isoprene-  
 927 OA enhancement is 19% of LO-OOA enhancement. Thus, every  $1 \mu\text{g m}^{-3}$  SOA is formed from  $\alpha$ -  
 928 pinene oxidation,  $0.16 \mu\text{g m}^{-3}$  [i.e.,  $0.19/(1+0.19)$ ] is apportioned into isoprene-OA factor and the  
 929 rest to LO-OOA factor.

930

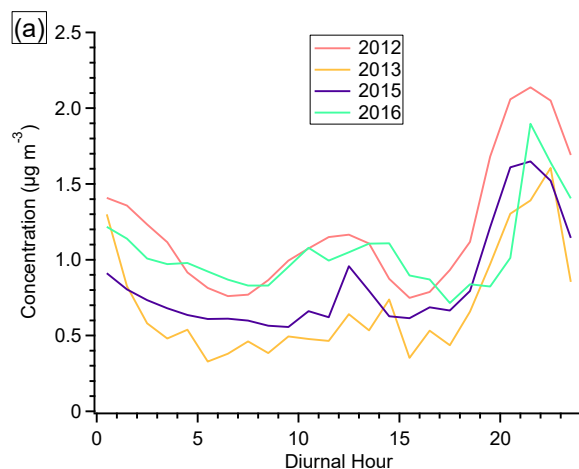

931

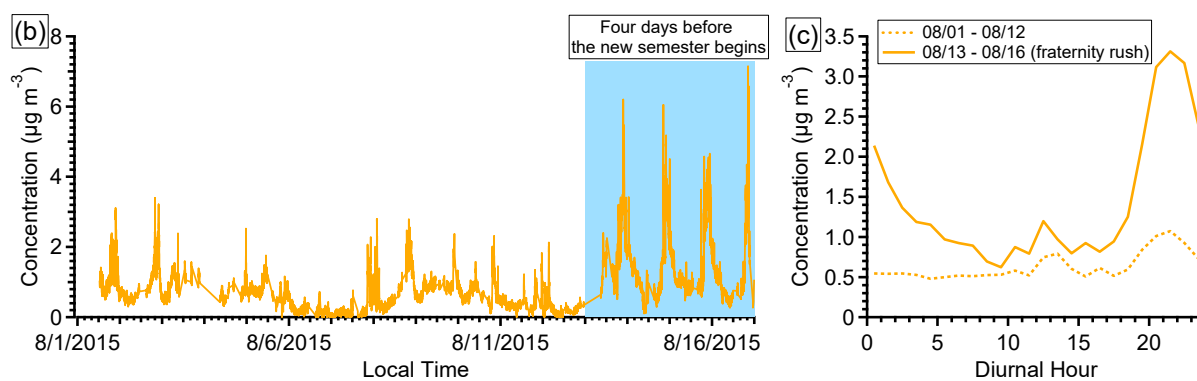

932

933 Fig. S6. (a) The diurnal trends of COA in ambient measurements conducted in different years  
 934 (2012 to 2016). (b) Time series of COA in 2015 measurements. (c) Diurnal trends of COA during  
 935 two periods of measurements in 2015 (08/01-08/21 and 08/13-08/16).

936

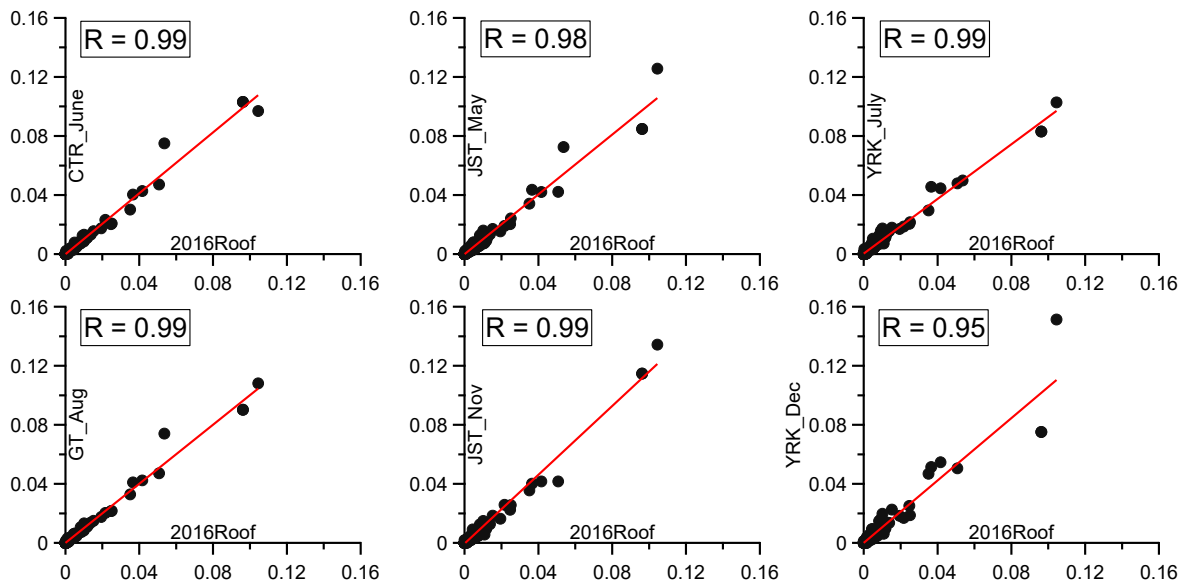

937

938 Fig. S7. The correlation plot between the mass spectrum of LO-OOA for 2016 rooflab perturbation  
 939 study and the LO-OOA obtained in other six ambient datasets in the southeastern U.S.

940

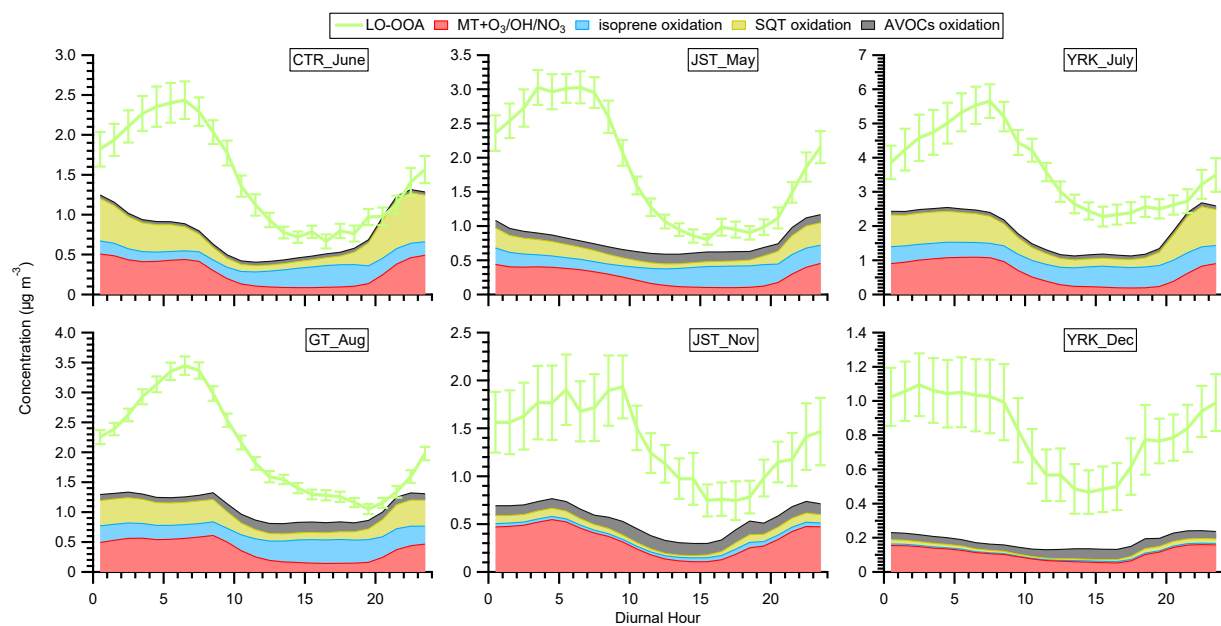

941  
 942 Fig. S8. The diurnal trends of LO-OOA and all fresh SOA (including isoprene (Odum two-product  
 943 representation), monoterpenes, sesquiterpenes, and anthropogenic VOCs) at different sampling  
 944 sites in the southeastern U.S. in the default CMAQv5.2 simulation. The error bars indicate the  
 945 standard error.

946

947

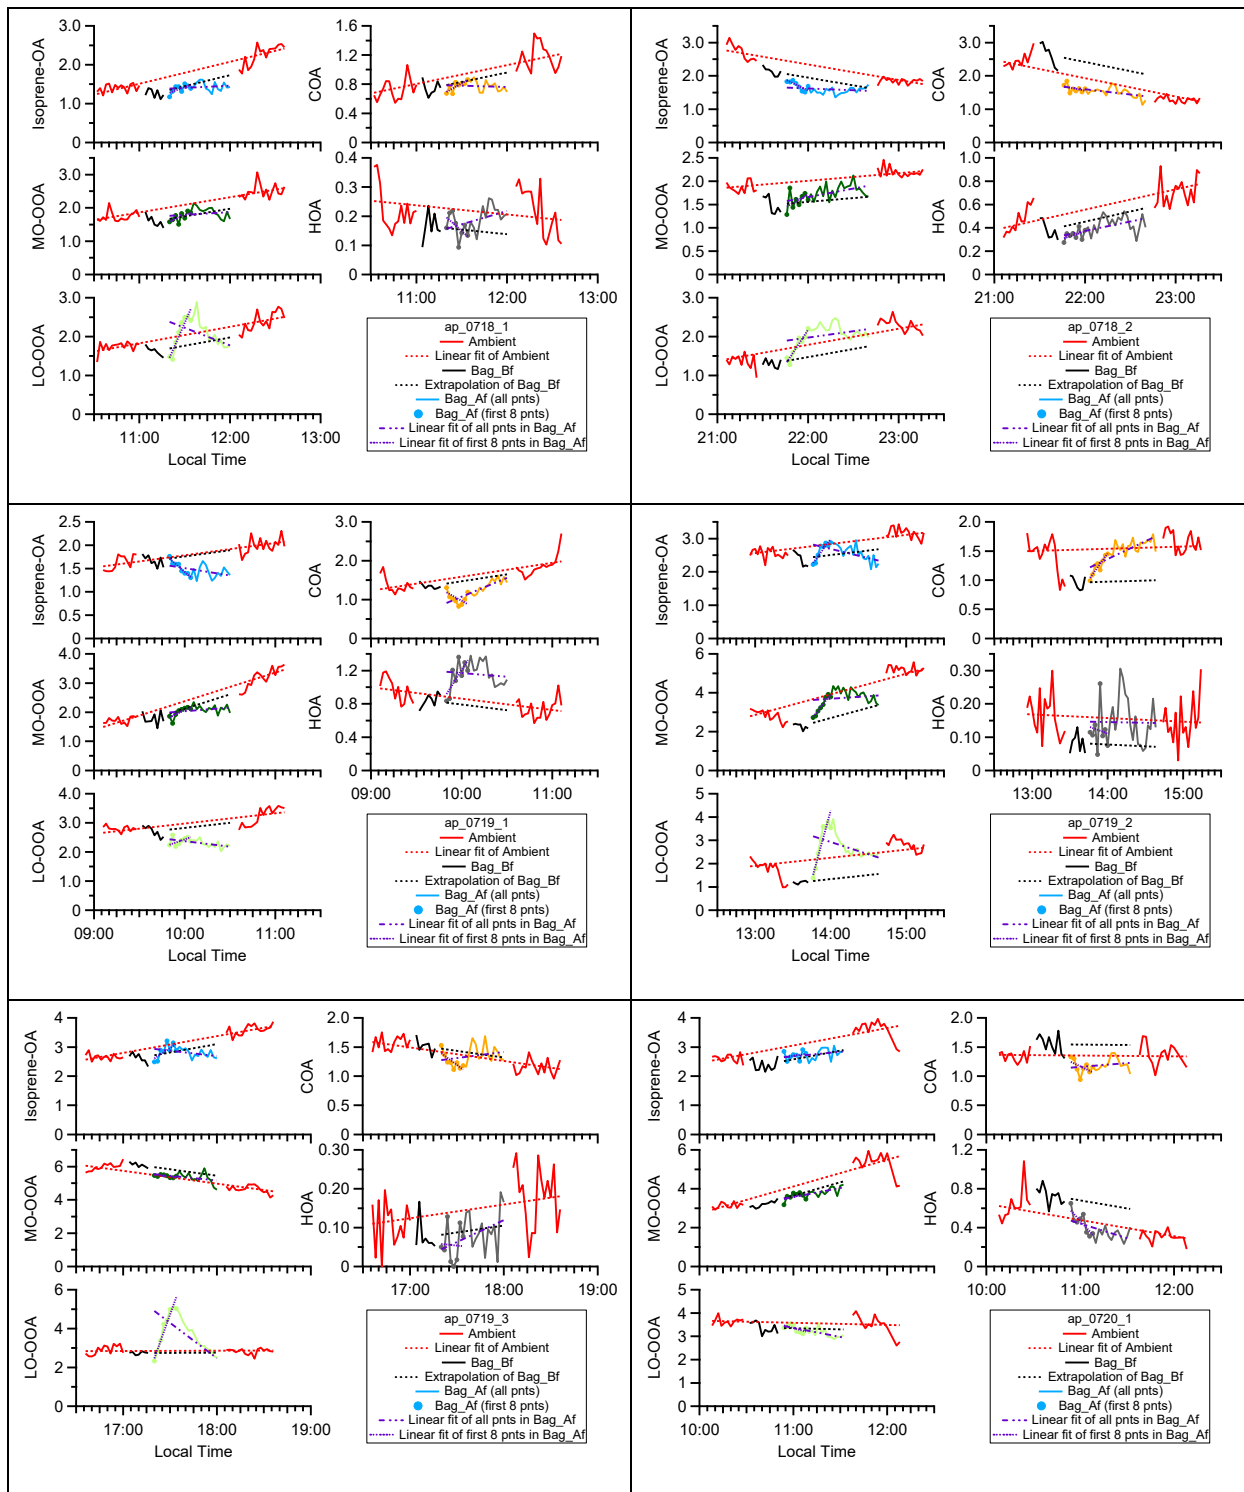

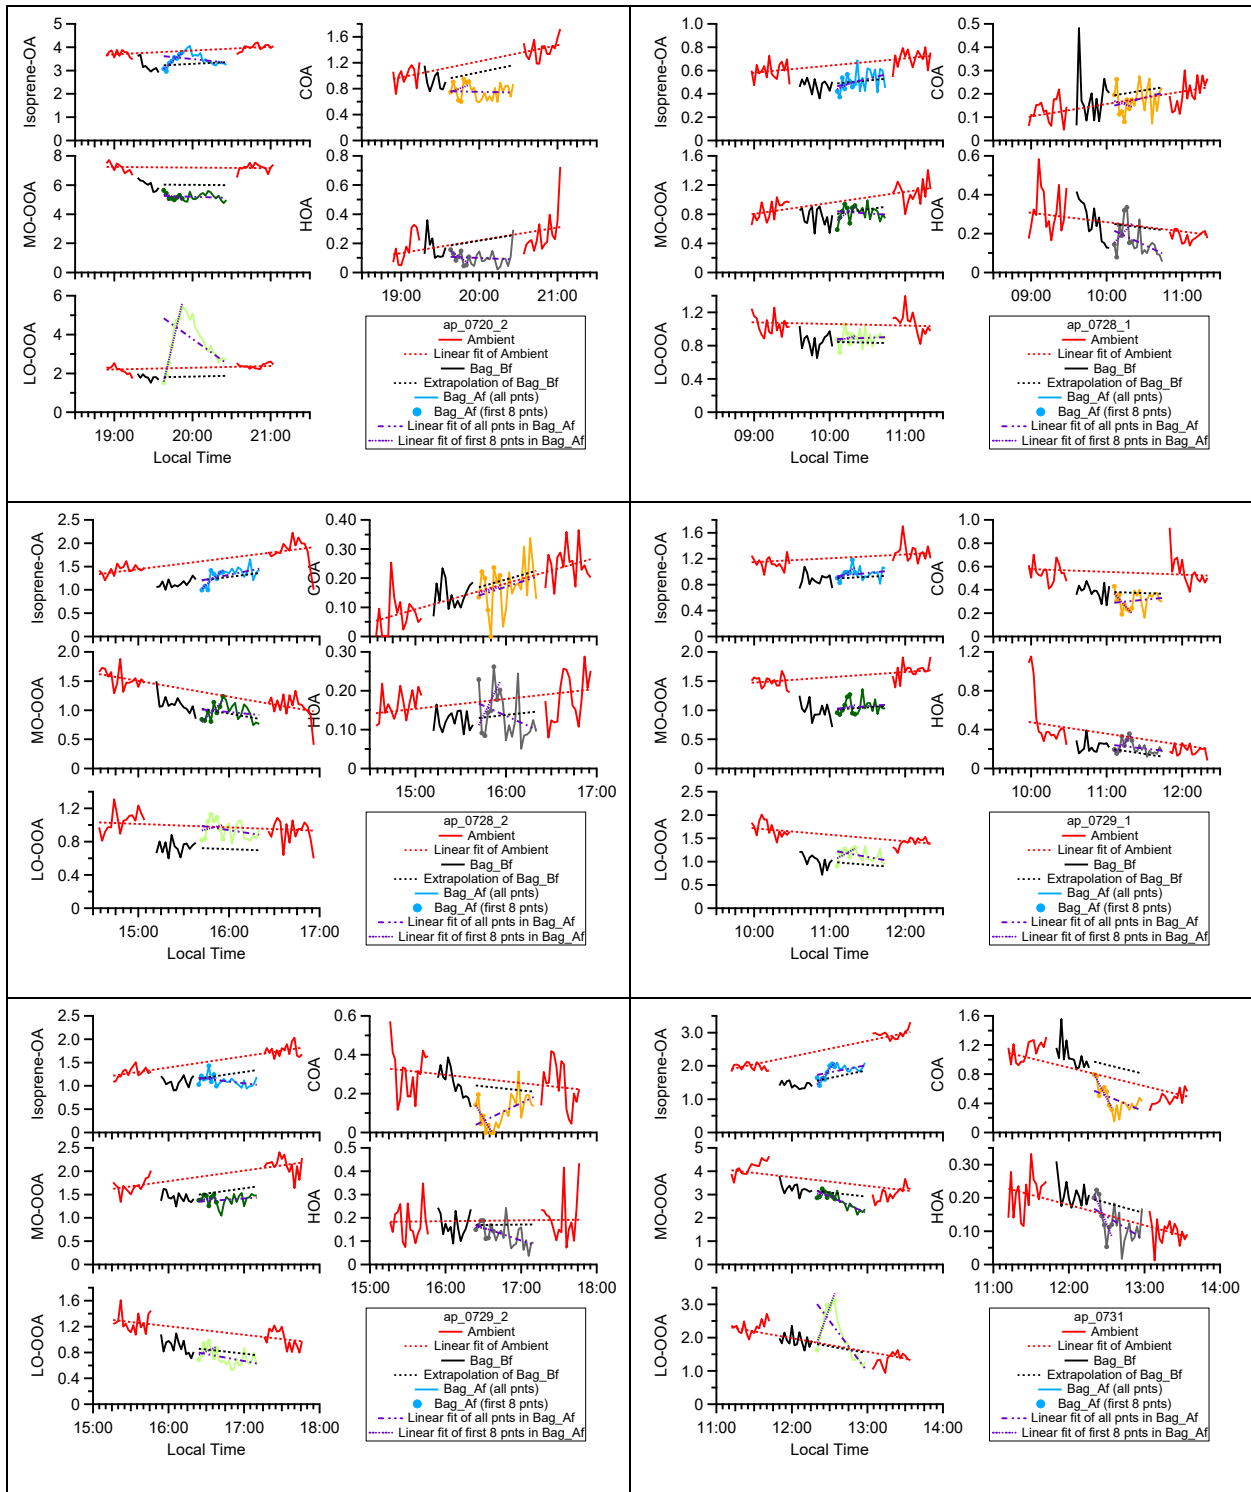

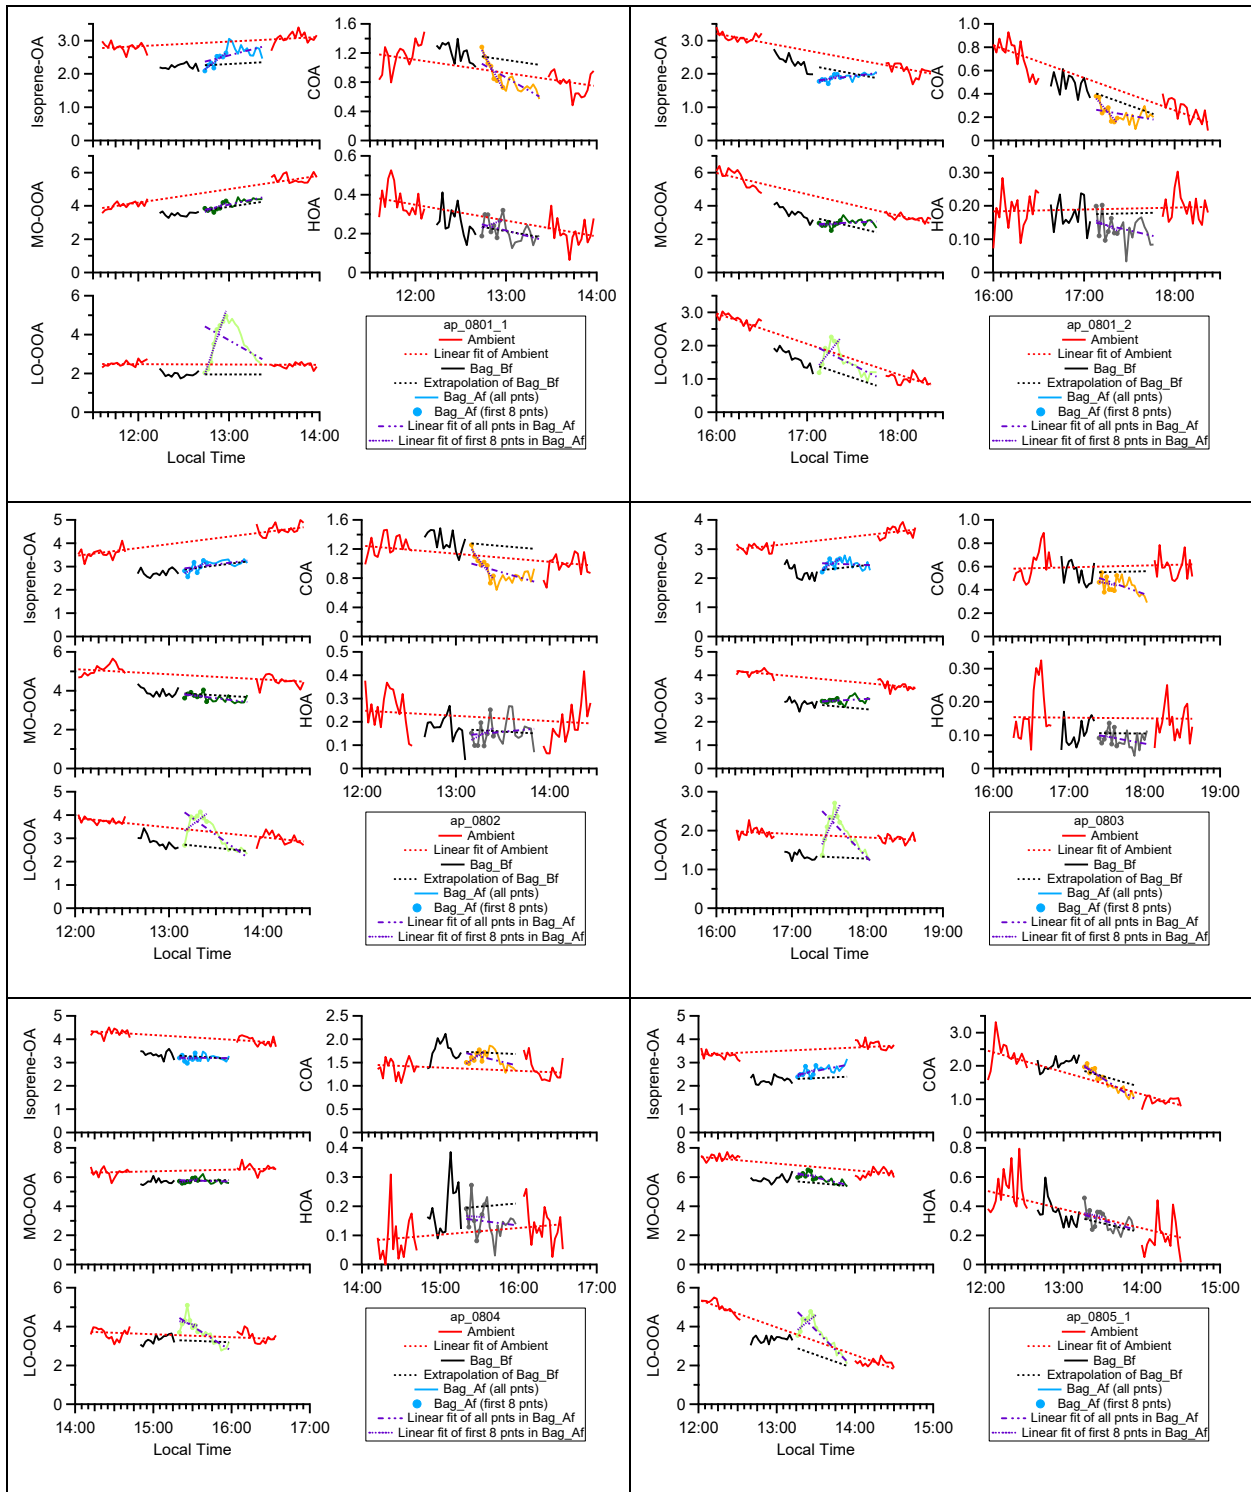

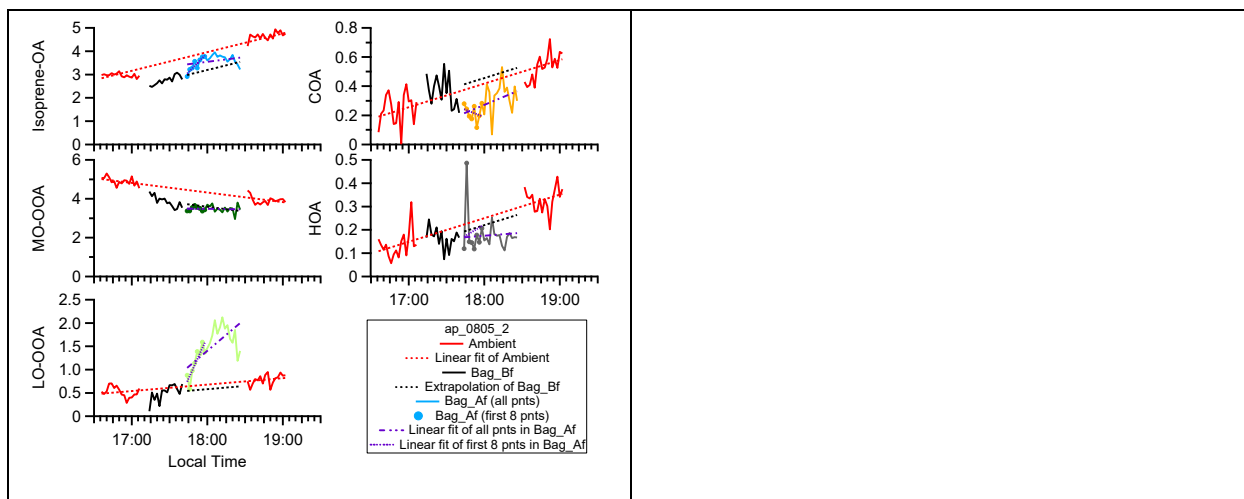

948 Fig. S9(a). Time series of OA factors in each  $\alpha$ -pinene experiment.

949

950

951

952

953

954

955

956

957

958

959

960

961

962

963

964

965

966

967



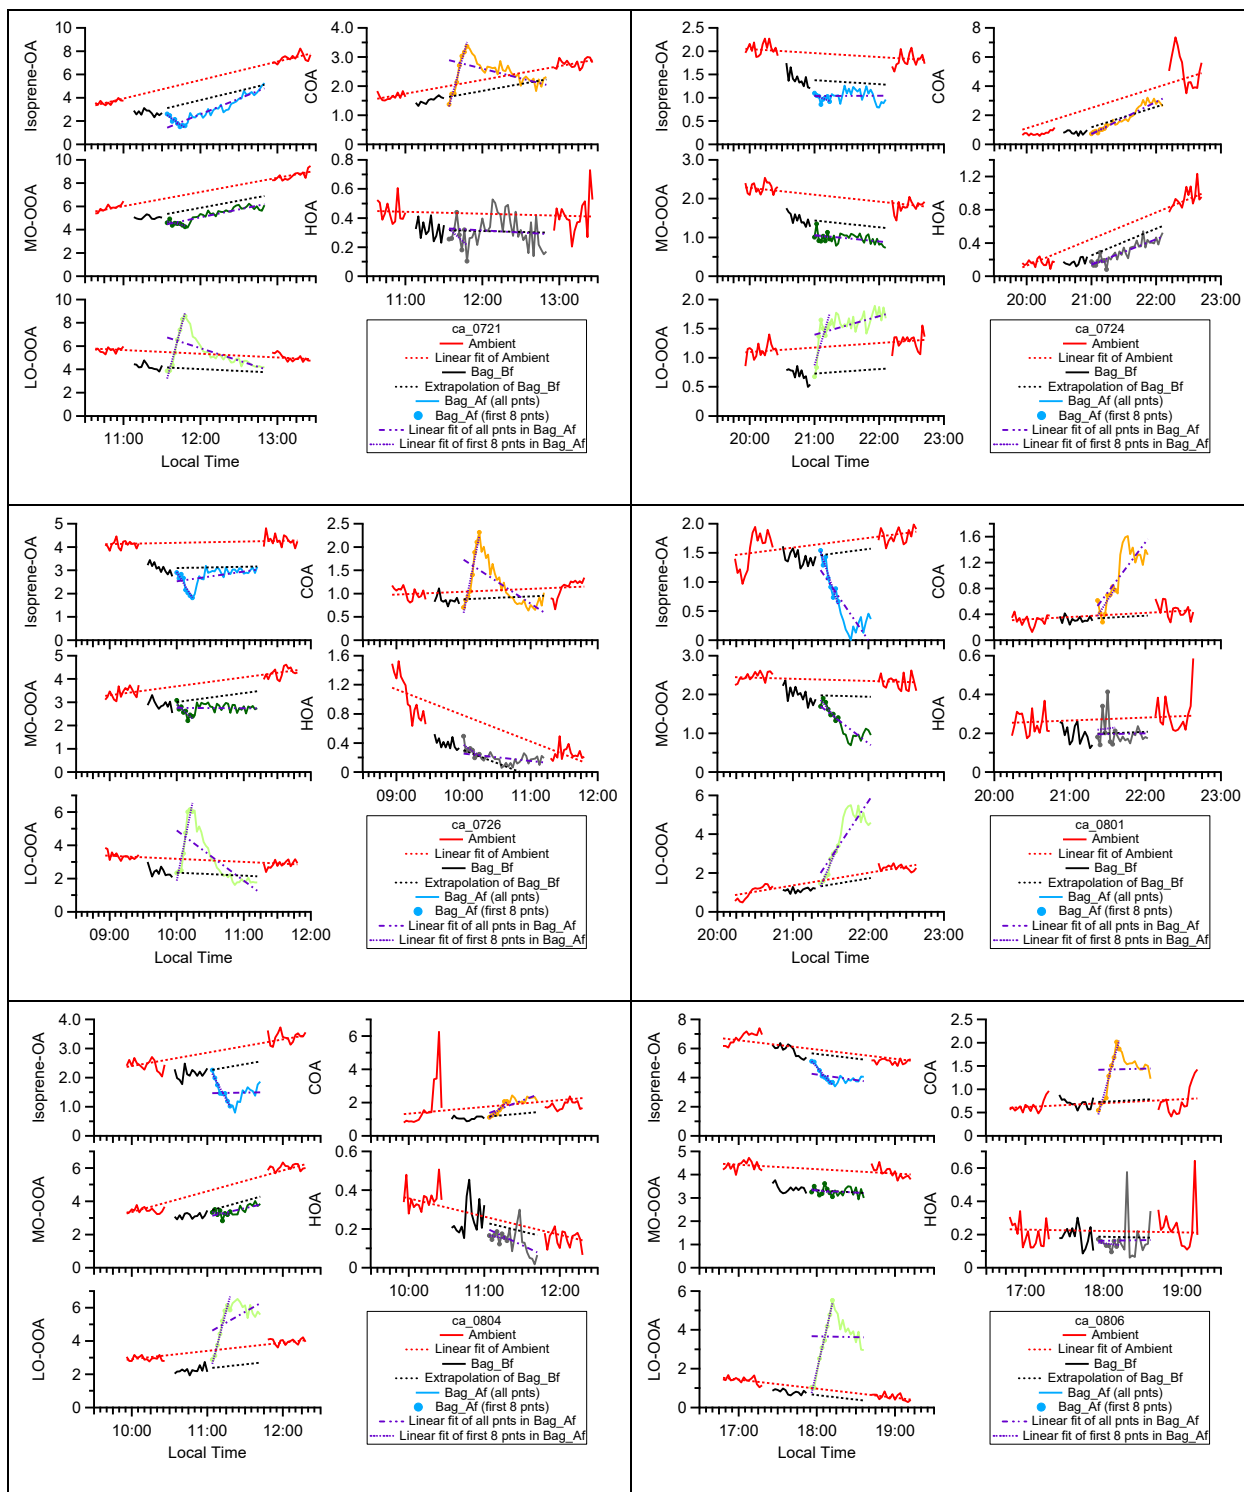

968 Fig. S9(b). Time series of OA factors in each  $\beta$ -caryophyllene experiment.

969

970

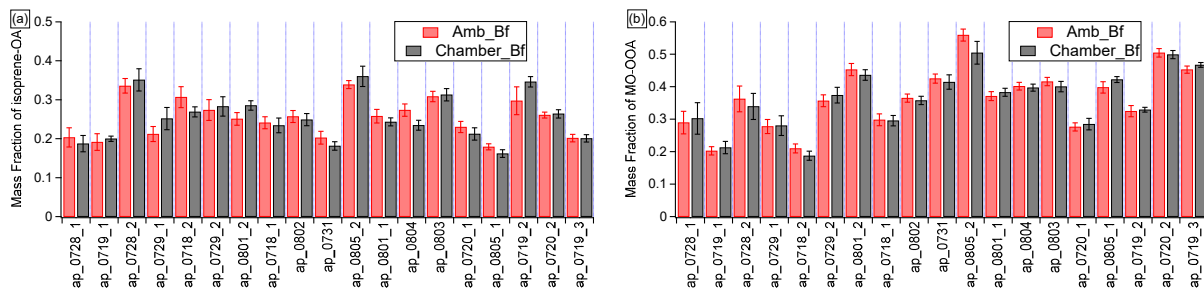

971

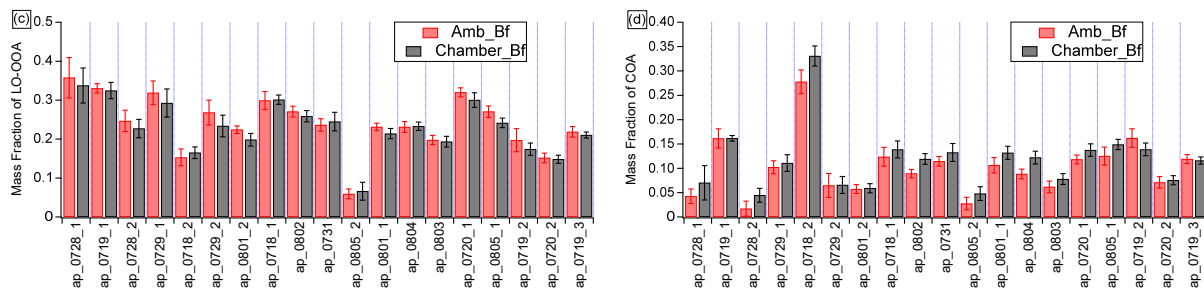

972

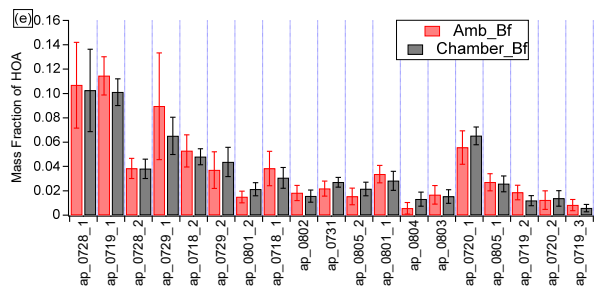

973 Fig. S10. The average mass fraction of OA factors in Amb\_Bf and Chamber\_Bf periods in  $\alpha$ -  
974 pinene experiments. The error bars represent the standard deviation. For most experiments, the  
975 average mass fractions in these two periods are not statistically significantly different, suggesting  
976 that the overall OA compositions are not statistically significantly different between two periods.

977

978

979

980

981

982

983

984

$\alpha$ -pinene experiments

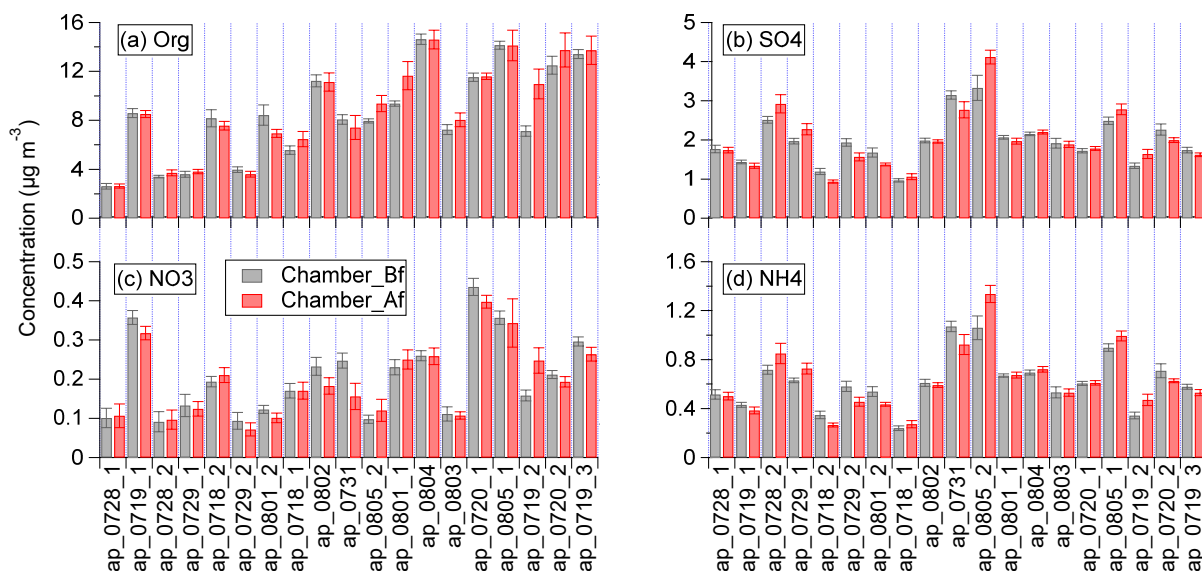

985

986

$\beta$ -caryophyllene experiments

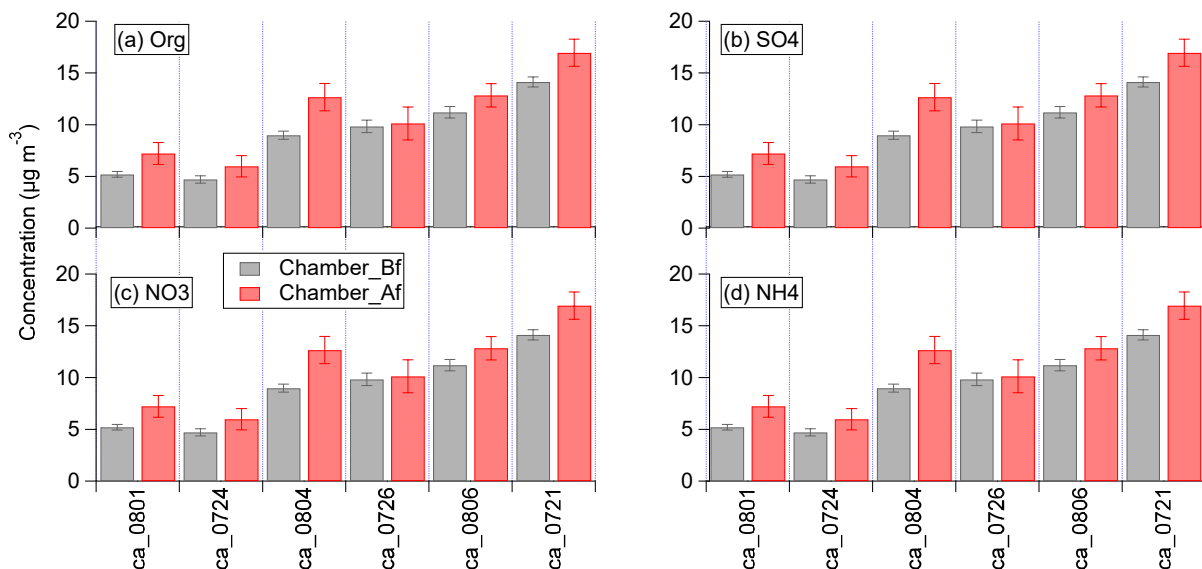

987

988 Fig. S11. The comparison of (a) Org, (b) SO<sub>4</sub>, (c) NO<sub>3</sub>, and (d) NH<sub>4</sub> concentrations between  
 989 “Chamber\_Bf” and “Chamber\_Af” for  $\alpha$ -pinene and  $\beta$ -caryophyllene perturbation experiments.  
 990 Note that the concentrations reported in these figures are simply from average over each period,  
 991 without any statistical analysis discussed in Appendix A. Thus, the differences between two  
 992 periods are highly affected by ambient variation.

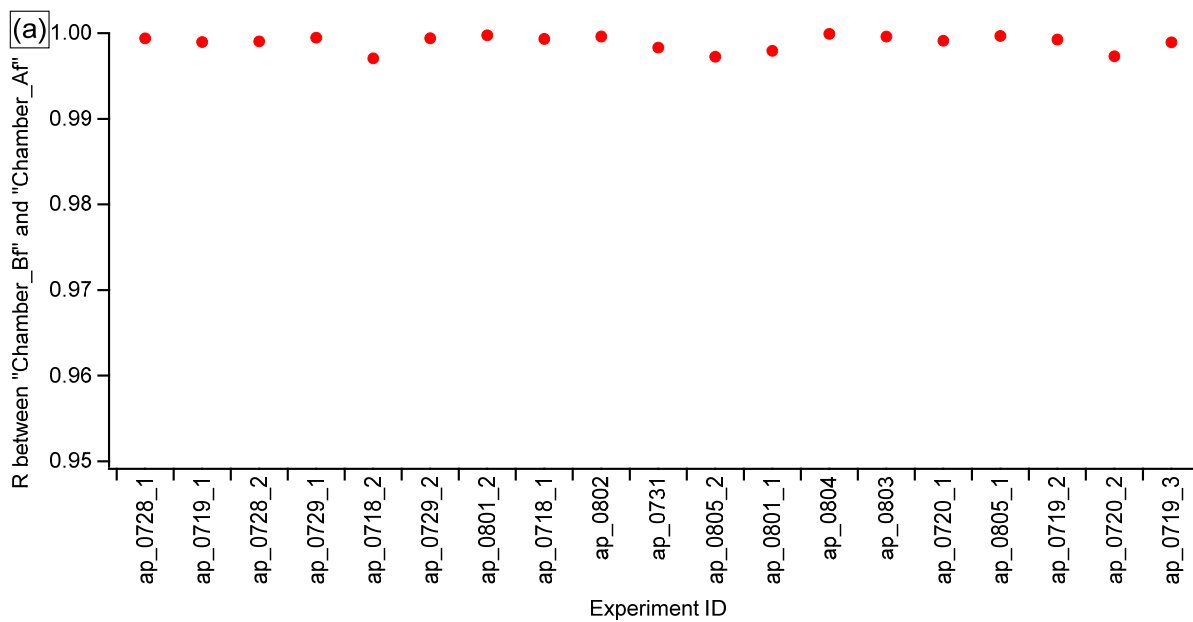

993

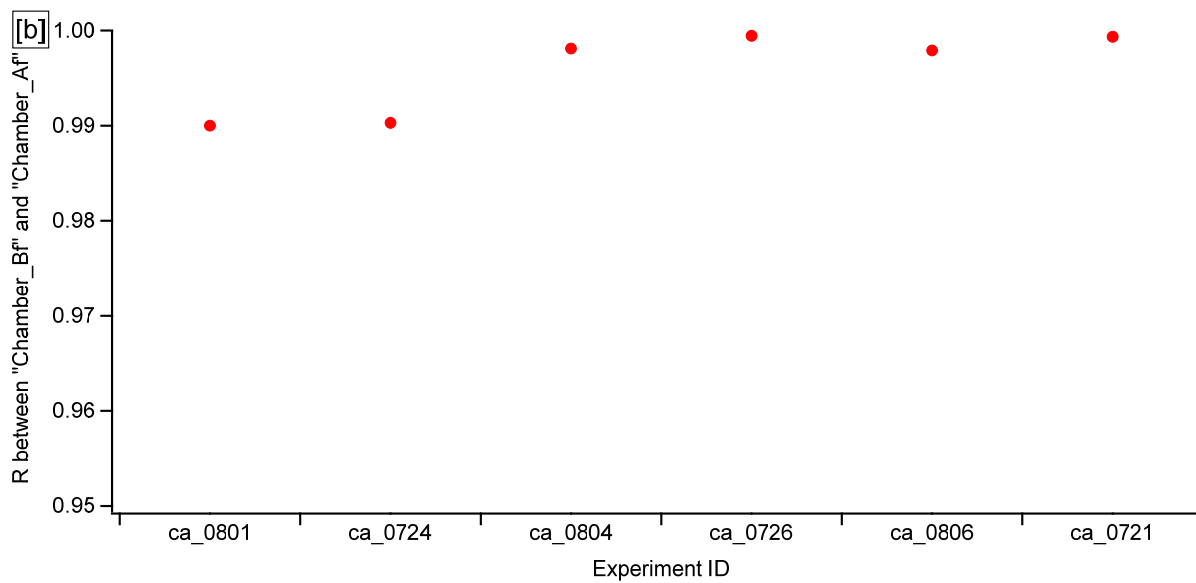

994

995 Fig. S12. The correlation coefficient by comparing the OA mass spectra between “Chamber\_Bf”  
 996 and “Chamber\_Af” in (a)  $\alpha$ -pinene and (b)  $\beta$ -caryophyllene perturbation experiments.

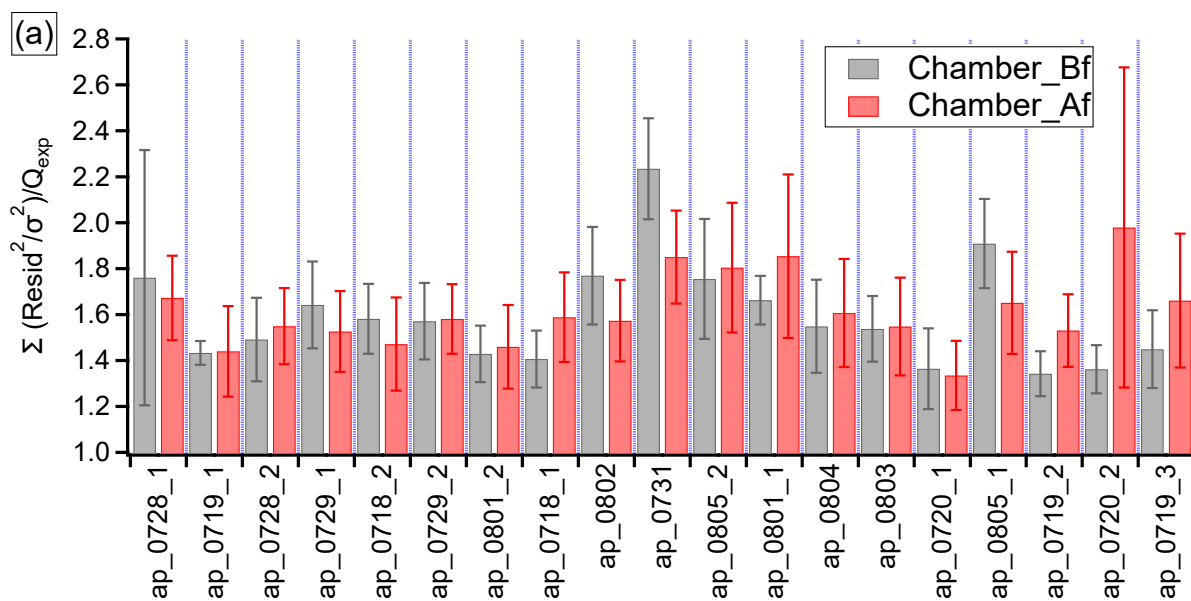

997

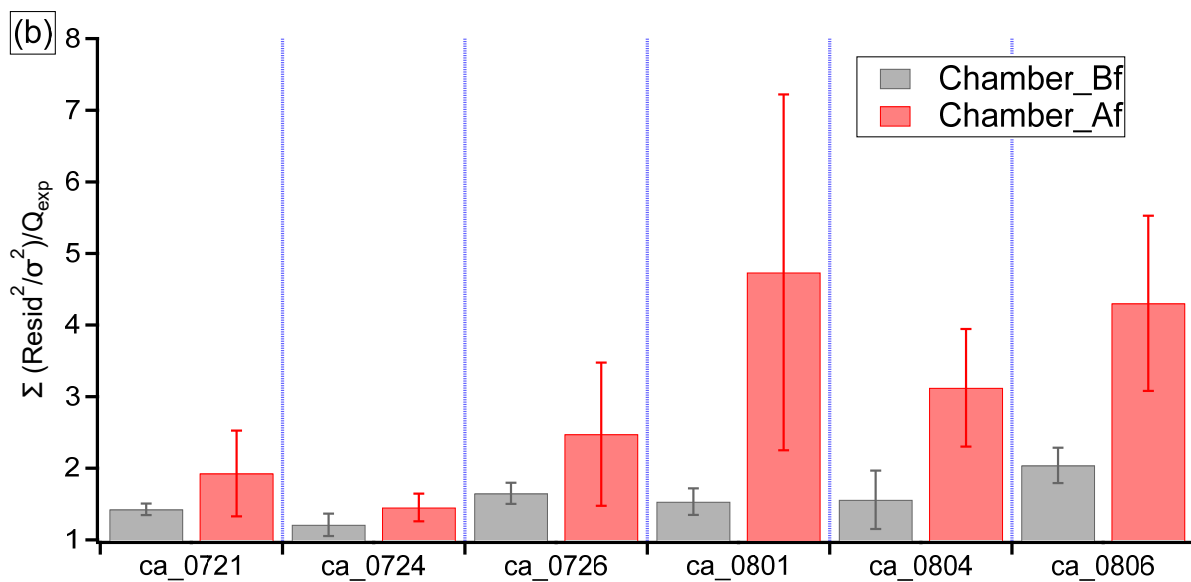

998

999 Fig. S13. The PMF residual ( $Q/Q_{\text{exp}}$ ) during “Chamber\_Bf” and “Chamber\_Af” periods for (a)  $\alpha$ -  
 1000 pinene and (b)  $\beta$ -caryophyllene perturbation experiments.

1001

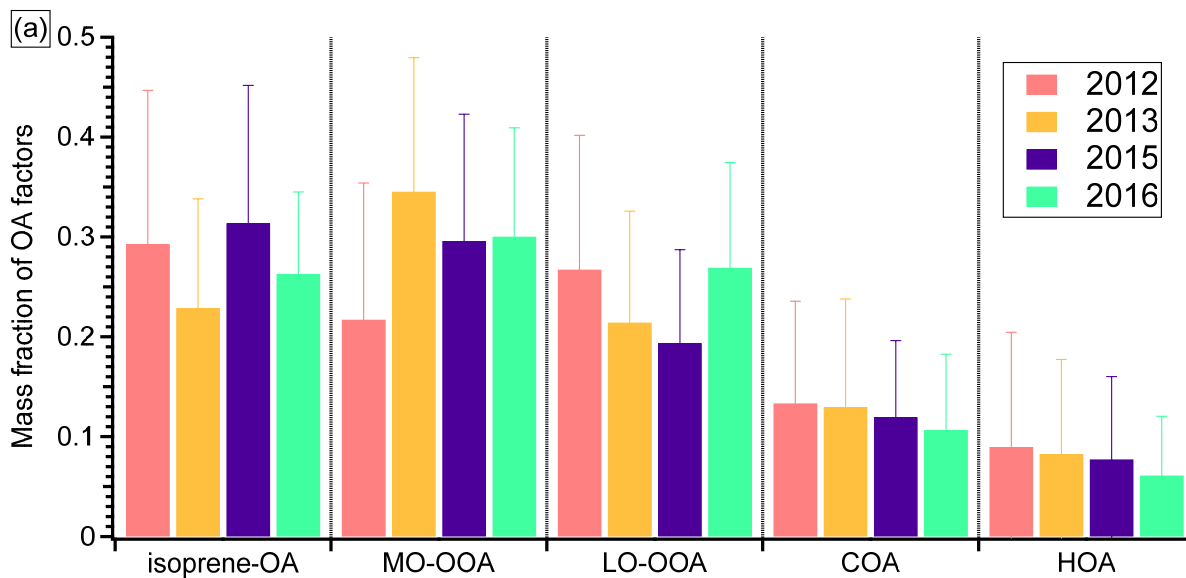

1002

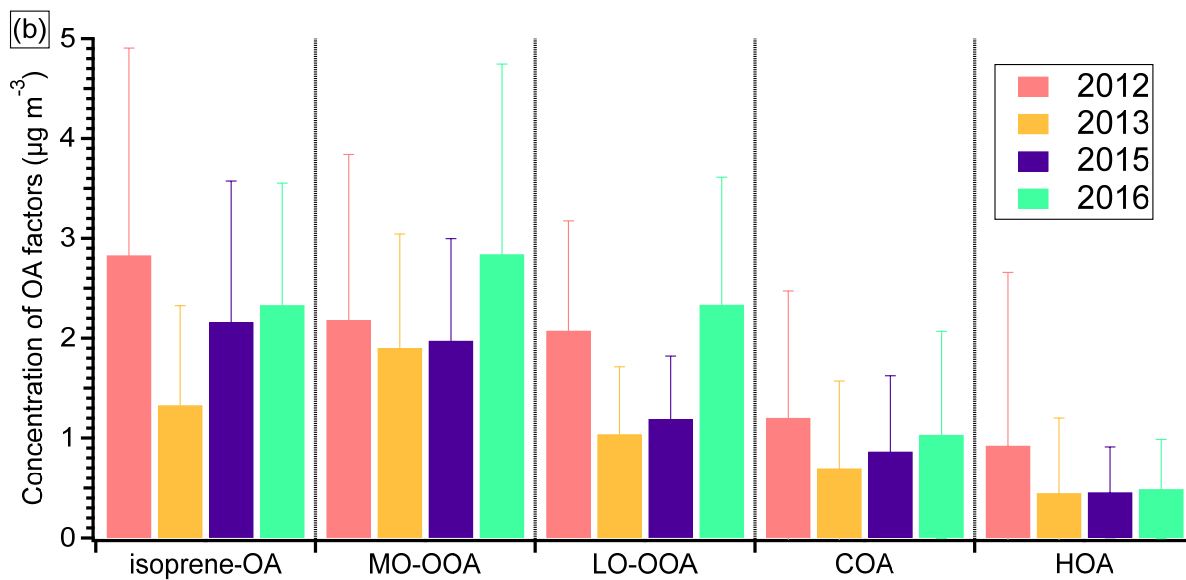

1003

1004 Fig. S14. The mass fraction of OA factors in ambient measurements conducted in different years  
 1005 (2012 to 2016).

1006

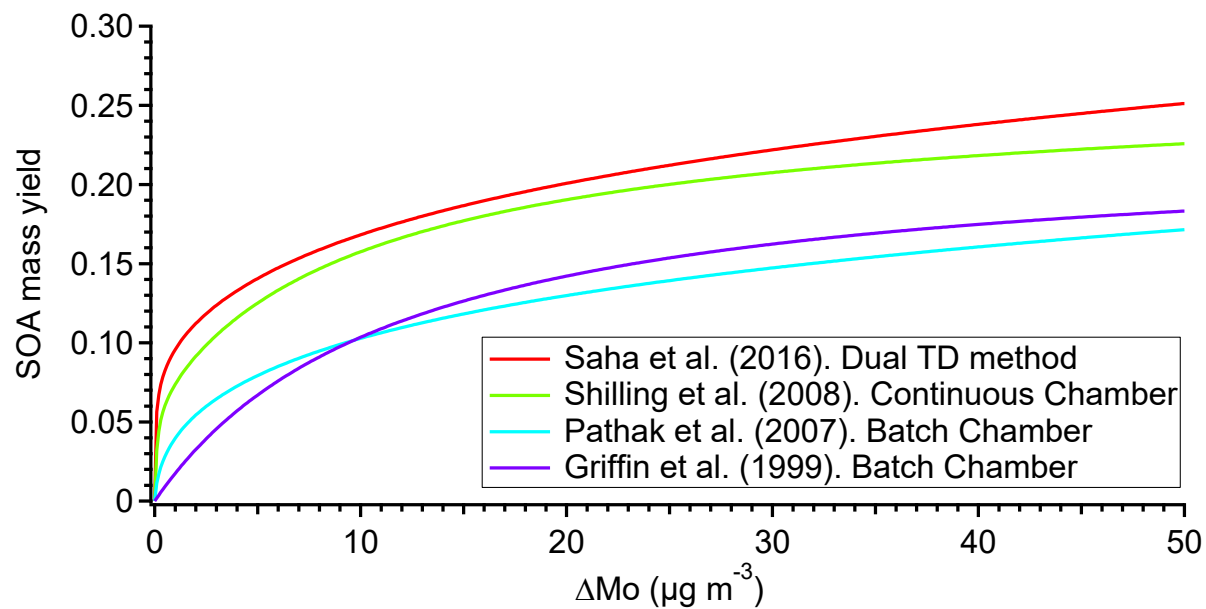

1007

1008 Fig. S15. Comparison of the SOA mass yields of  $\alpha$ -pinene ozonolysis in the literature. SOA  
 1009 density of  $1 \text{ g cm}^{-3}$  is used in all studies to facilitate comparison. Note that in Saha et al. (2016),  
 1010 the SOA concentration is required to calculate the SOA yield parameterizations. The yields with  
 1011  $445 \mu\text{g m}^{-3}$  aerosol loading (column *i* of Table 1 in Saha et al.) are reported in this study.

1012

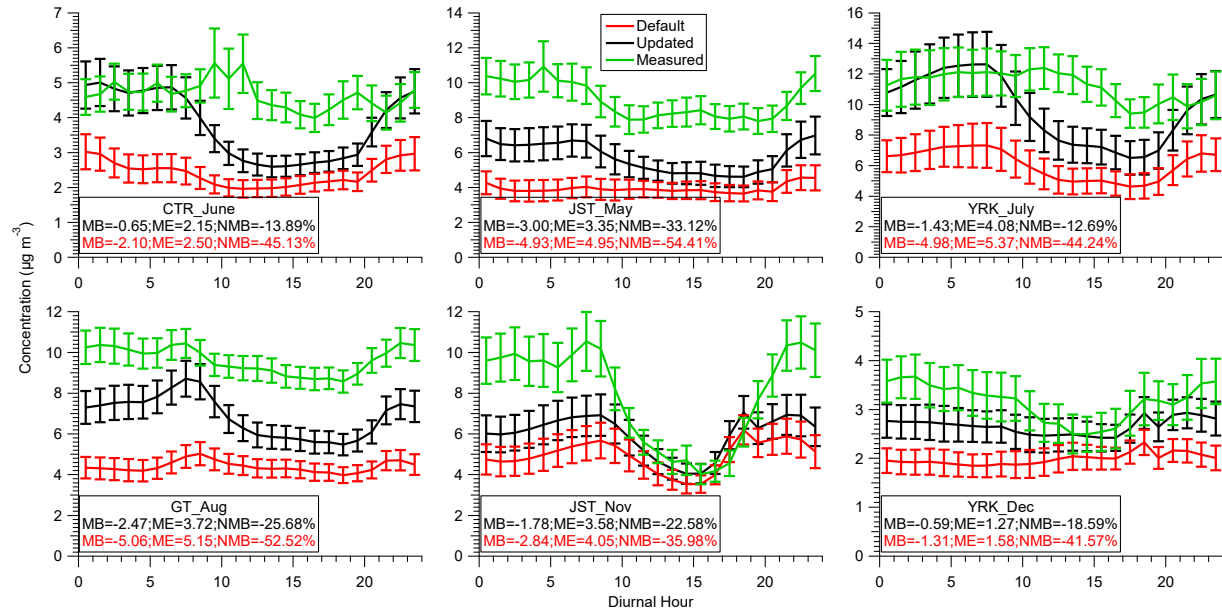

1013

1014 Fig. S16. The diurnal trends of AMS measured OA and CMAQ predicted OA mass concentration  
 1015 (PM<sub>1</sub>) in both default and updated simulations. Mean bias (MB), mean error (ME), normalized  
 1016 mean bias (NMB) are shown in each panel.

1017



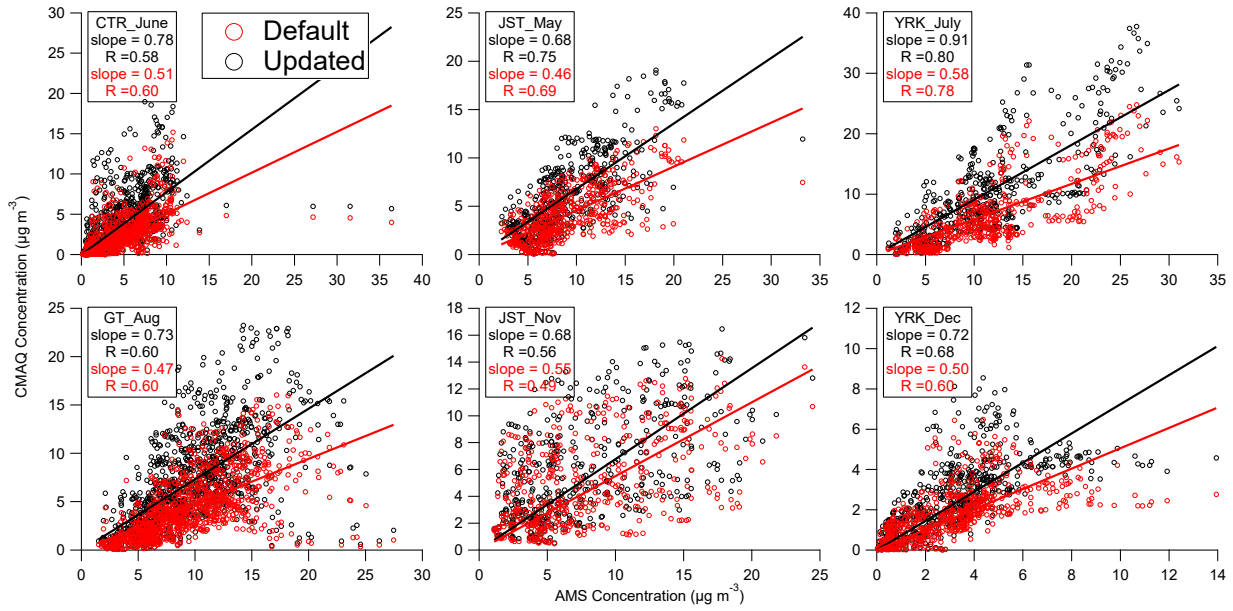

1018

1019 Fig. S17. The scatter plots of AMS measured OA and CMAQ predicted OA mass concentration in  
 1020 both default and updated simulations. The slopes and R are obtained by least square fit.

1021

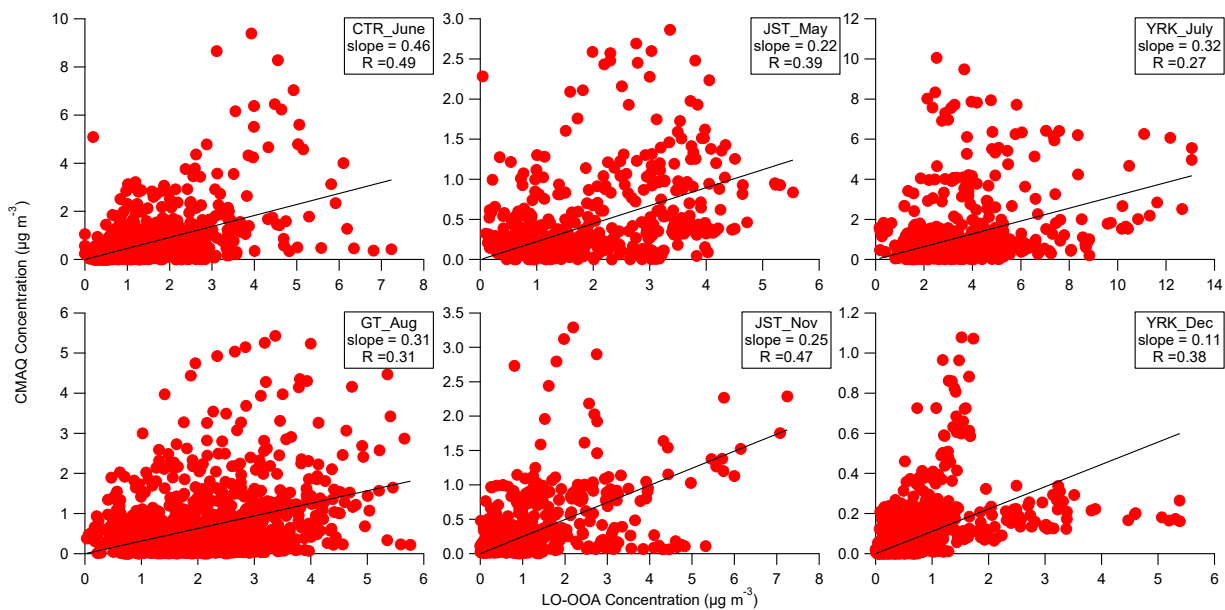

1022

1023 Fig. S18. The scatter plots of LO-OOA and CMAQ predicted SOA mass concentration from  
 1024 monoterpenes and sesquiterpenes in the default simulation at different sampling sites in the  
 1025 southeastern U.S. The slopes and R are obtained by least square fit. The intercepts are forced to be  
 1026 zero.

1027

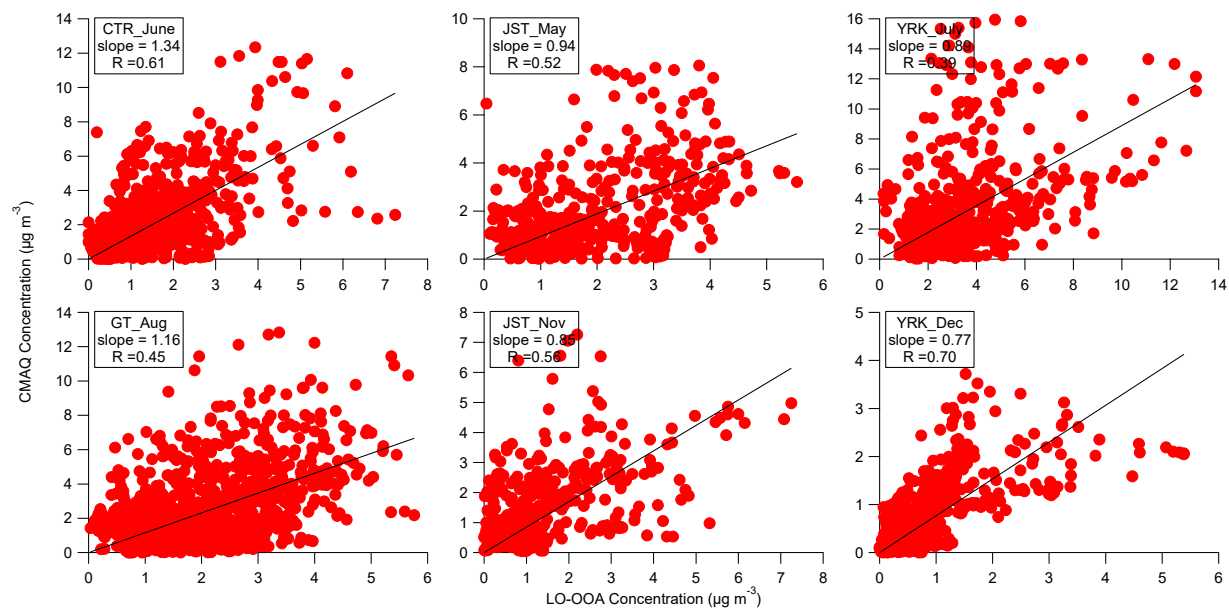

1028

1029 Fig. S19. The scatter plot between LO-OOA and modeled SOA mass concentration from  
 1030 monoterpene and sesquiterpene in updated simulation at different sampling sites in the  
 1031 southeastern U.S. The slope and R are obtained from the least square fit. The intercepts are forced  
 1032 to be zero.

1033

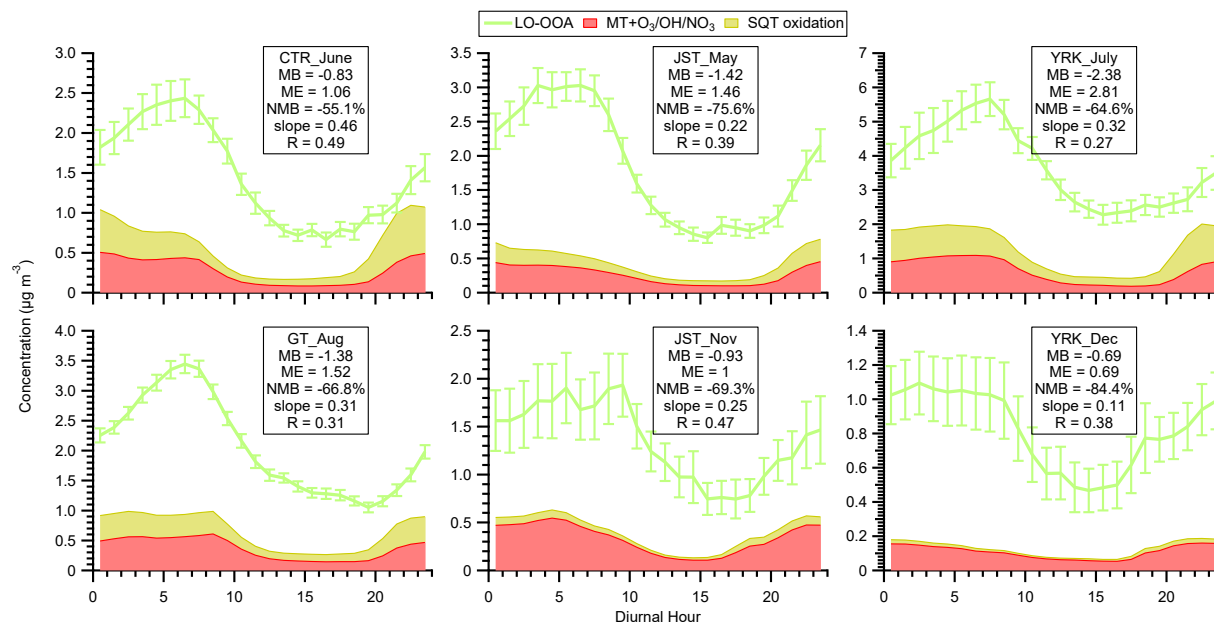

1034

1035 Fig. S20. The diurnal trends of LO-OOA and modeled SOA from monoterpenes and  
 1036 sesquiterpenes at different sampling sites in the southeastern U.S. in the default simulation. The  
 1037 mean bias (MB), mean error (ME), and normalized mean bias (NMB) are shown for each site. The  
 1038 slopes and R are obtained by least square fit.

1039

1040

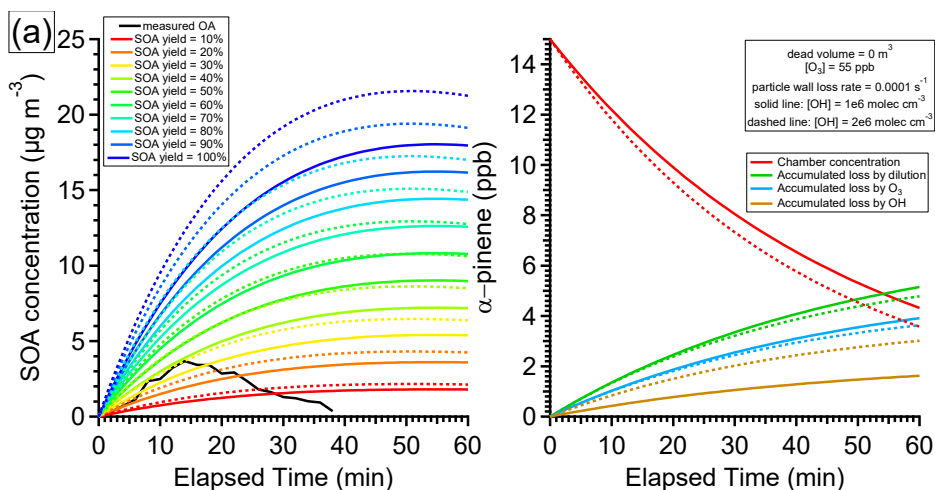

1041

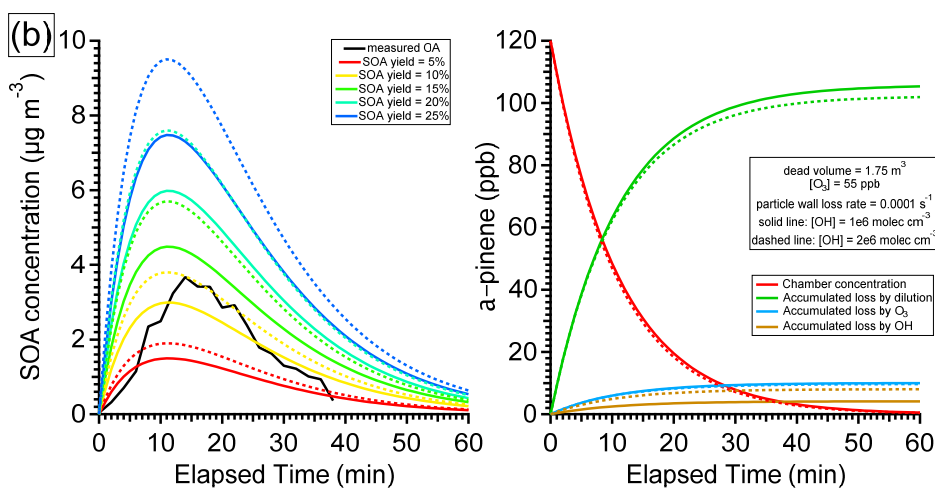

1042

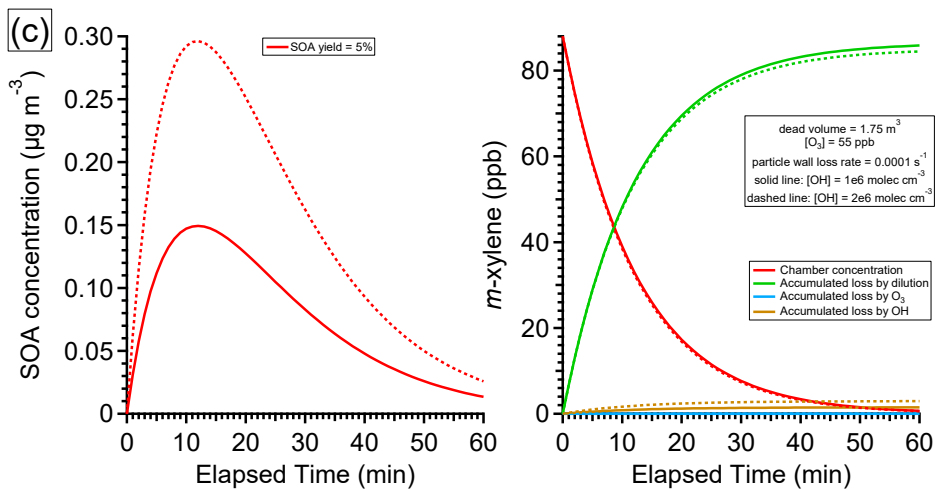

1043 Fig. S21. Simulated time series of VOCs and SOA based on a simple box model. (a)  $\alpha$ -pinene  
 1044 experiments assuming a range of SOA yields and no dead volume. (b)  $\alpha$ -pinene experiments  
 1045 assuming a range of SOA yields and  $1.75 \text{ m}^3$  dead volume. (c)  $m$ -xylene experiments assuming 5%  
 1046 SOA yield and  $1.75 \text{ m}^3$  dead volume.

1047

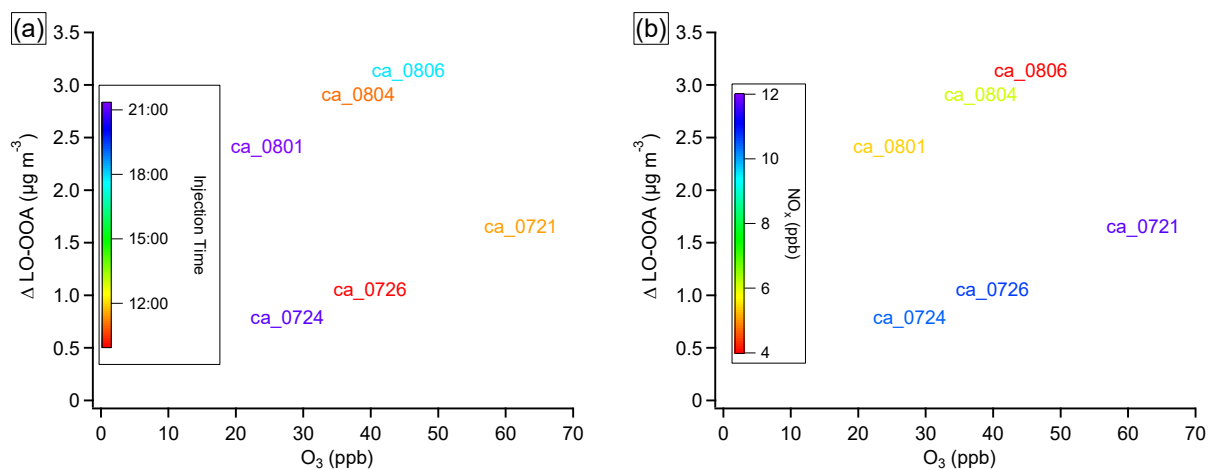

1048

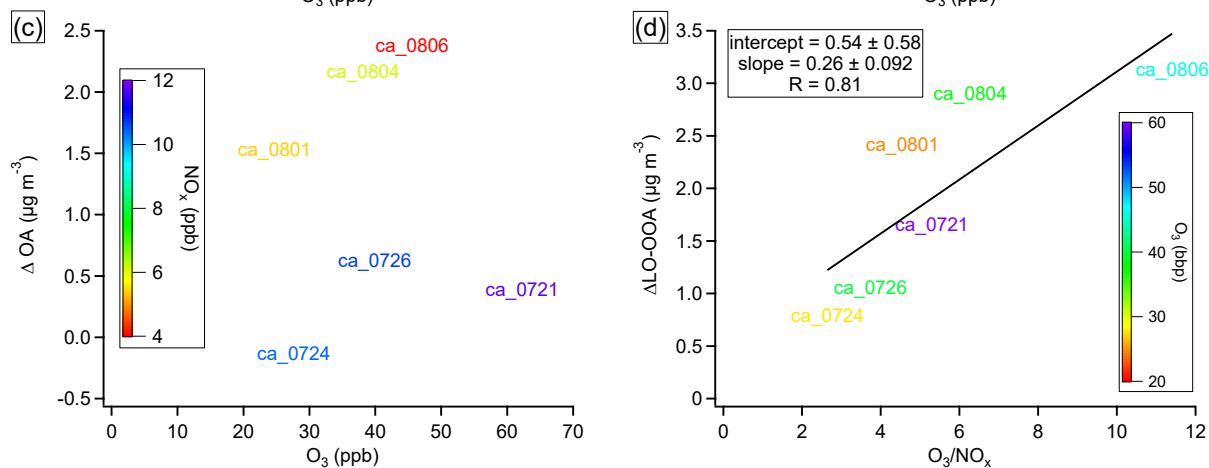

1049

1050

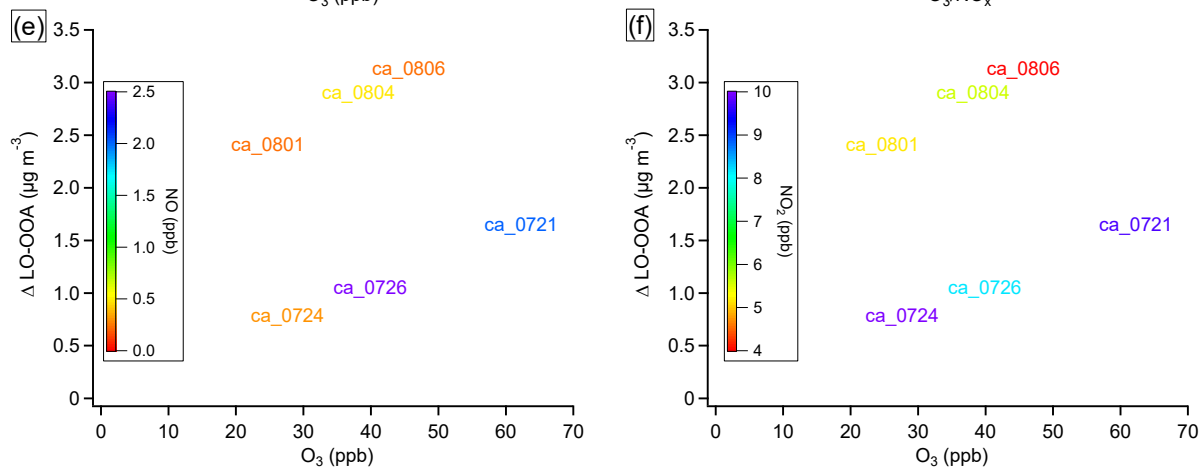

1051 Fig. S22. The influence of  $\text{NO}_x$  on  $\beta$ -caryophyllene SOA formation. (a)  $\Delta\text{LO-OOA}$  as a function  
 1052 of  $\text{O}_3$ , colored by injection time. (b)  $\Delta\text{LO-OOA}$  as a function of  $\text{O}_3$ , colored by  $\text{NO}_x$ . (c)  $\Delta\text{OA}$  as  
 1053 a function of  $\text{O}_3$ , colored by injection time. (d)  $\Delta\text{LO-OOA}$  as a function of  $\text{O}_3/\text{NO}_x$  ratio, colored  
 1054 by  $\text{O}_3$ . The slopes and intercepts are obtained by least square fit. (e)  $\Delta\text{LO-OOA}$  as a function of  
 1055  $\text{O}_3$ , colored by  $\text{NO}$ . (f)  $\Delta\text{LO-OOA}$  as a function of  $\text{O}_3$ , colored by  $\text{NO}_2$ .

1056 Table S1. Sampling sites and periods for the Southeastern Center for Air Pollution and  
1057 Epidemiology (SCAPE) study and the Southern Oxidant and Aerosol Study (SOAS).

1058

| Site (Abbreviation)        | Sampling Period       |
|----------------------------|-----------------------|
| Jefferson Street (JST_May) | 5/10/2012 - 6/2/2012  |
| Yorkville (YRK_July)       | 6/26/2012 - 7/20/2012 |
| Georgia Tech (GT_Aug)      | 7/20/2012 - 9/4/2012  |
| Jefferson Street (JST_Nov) | 11/6/2012 - 12/4/2012 |
| Yorkville (YRK_Dec)        | 12/5/2012 - 1/10/2013 |
| Centreville (CTR_June)     | 6/1/2013 – 7/15/2013  |

1059

1060

1061

1062

1063

1064

1065

1066

1067 Table S2. The experimental conditions of laboratory  $\alpha$ -pinene experiments.

| Expt. | [HC] <sub>0</sub><br>(ppb) | Oxidant<br>precursor          | RH  | NO<br>(ppb) <sup>b</sup> | NO <sub>2</sub><br>(ppb) <sup>b</sup> | O <sub>3</sub><br>(ppb) <sup>b</sup> | OH<br>(10 <sup>6</sup> molec cm <sup>-3</sup> ) <sup>e</sup> |
|-------|----------------------------|-------------------------------|-----|--------------------------|---------------------------------------|--------------------------------------|--------------------------------------------------------------|
| 1     | 334 <sup>a</sup>           | H <sub>2</sub> O <sub>2</sub> | 40% | <DL, <DL <sup>c</sup>    | <1, <1 <sup>c</sup>                   | N.A.                                 | 1.0                                                          |
| 2     | 174 <sup>a</sup>           | HONO                          | <5% | 269, 167                 | 310, 440                              | 5, 32                                | 10.9                                                         |
| 3     | 15                         | NO <sub>2</sub>               | 50% | 23, 7 <sup>d</sup>       | 60, 60                                | 20, 71                               | 3.6                                                          |

1068 <sup>a</sup>More than 100ppb  $\alpha$ -pinene is injected in the first two experiments. It is because these two  
1069 experiments were designed to produce large amounts of SOA for filter collection and offline  
1070 analysis.

1071 <sup>b</sup>There are two values in these columns. The first value represents the initial concentration when  
1072 turning on the lights. The second value represents the concentration when the OA concentration  
1073 reaches about 10  $\mu\text{g m}^{-3}$ .

1074 <sup>c</sup>Background NO<sub>x</sub> level in the chamber.

1075 <sup>d</sup>The initial concentrations of NO, NO<sub>2</sub>, and O<sub>3</sub> in NO<sub>2</sub>+hv experiments are reported at 3 min after  
1076 turning on lights.

1077 <sup>e</sup>The OH concentration is estimated based on the decay of  $\alpha$ -pinene, after considering the  
1078 consumption of  $\alpha$ -pinene by O<sub>3</sub>.

1079



1080 Table S3. The properties of the lumped oxidation products from monoterpenes + O<sub>3</sub>/OH.

| Species | $\alpha^1$        | C* <sup>1</sup>      | enthalpy <sup>1</sup> | Potential surrogate structure                                                          | nC <sup>2</sup> | nO <sup>2</sup> | nH <sup>2</sup> | MW                  | OM/OC             | H <sup>3</sup>      | V lebas                           | Dg                              | density            |
|---------|-------------------|----------------------|-----------------------|----------------------------------------------------------------------------------------|-----------------|-----------------|-----------------|---------------------|-------------------|---------------------|-----------------------------------|---------------------------------|--------------------|
|         | g g <sup>-1</sup> | $\mu\text{g m}^{-3}$ | kJ mol <sup>-1</sup>  |                                                                                        |                 |                 |                 | g mol <sup>-1</sup> | g g <sup>-1</sup> | M atm <sup>-1</sup> | cm <sup>3</sup> mol <sup>-1</sup> | cm <sup>2</sup> s <sup>-1</sup> | g cm <sup>-3</sup> |
| MT1     | 0.040             | 0.01                 | 102.0                 | C <sub>15</sub> H <sub>24</sub> O <sub>6</sub> (Zhang et al., 2015)                    | 15              | 6               | 24              | 300                 | 1.67              | 7.1E+11             | 355.2                             | 0.0424                          | 1.4                |
| MT2     | 0.032             | 0.1                  | 91.0                  | C <sub>10</sub> H <sub>16</sub> O <sub>4</sub> (Chan et al., 2009; Zhang et al., 2015) | 10              | 4               | 16              | 200                 | 1.67              | 8.9E+10             | 236.8                             | 0.0556                          | 1.4                |
| MT3     | 0.032             | 1                    | 80.0                  | pinic acid (Yu et al., 1999)                                                           | 9               | 4               | 14              | 186                 | 1.72              | 1.1E+10             | 214.6                             | 0.0583                          | 1.4                |
| MT4     | 0.103             | 10                   | 69.0                  | hydroxypinonaldehyde (Yu et al., 1999)                                                 | 10              | 3               | 16              | 184                 | 1.53              | 1.4E+09             | 229.4                             | 0.0587                          | 1.4                |
| MT5     | 0.143             | 100                  | 58.0                  | norpinonic acid (Yu et al., 1999)                                                      | 9               | 3               | 14              | 170                 | 1.57              | 1.8E+08             | 207.2                             | 0.0619                          | 1.4                |
| MT6     | 0.285             | 1000                 | 47.0                  | pinonaldehyde (Yu et al., 1999)                                                        | 10              | 2               | 16              | 168                 | 1.40              | 2.2E+07             | 222.0                             | 0.0624                          | 1.4                |
| MT7     | 0.160             | 10000                | 36.0                  | norpinonaldehyde (Yu et al., 1999)                                                     | 9               | 2               | 14              | 154                 | 1.43              | 2.8E+06             | 199.8                             | 0.0661                          | 1.4                |

1081 <sup>1</sup> $\alpha$ , C\* (@298K), and enthalpies are based on TD fit in Table 1 Saha and Grieshop (2016) assuming  
 1082 an OA concentration of 445  $\mu\text{g m}^{-3}$ .

1083 <sup>2</sup>Number of oxygen per surrogate is based on Donahue et al. (2011) relationship as used in Pye et  
 1084 al. (2017). Number of carbon and oxygen used to find potential surrogate structure.

1085 <sup>3</sup>Henry's Law Coefficients (H) is based on Hodzic et al. (2014) and relationship with C\*. An  
 1086 enthalpy of solvation of 50 kJ mol<sup>-1</sup> is used.

1087

1088 Table S4. Experimental conditions for ambient perturbation experiments.

| Perturbation    | Expt ID <sup>a</sup> | Date      | Injection Time | Perturbation Amount <sup>b</sup> | NO <sup>c</sup> (ppb) | NO <sub>2</sub> <sup>c</sup> (ppb) | O <sub>3</sub> <sup>c</sup> (ppb) |
|-----------------|----------------------|-----------|----------------|----------------------------------|-----------------------|------------------------------------|-----------------------------------|
| α-pinene        | ap_0718_1            | 7/18/2016 | 11:18          | 14                               | 0.69                  | 3.57                               | 48.3                              |
|                 | ap_0718_2            | 7/18/2016 | 21:44          | 14                               | 0.29                  | 10.12                              | 40.2                              |
|                 | ap_0719_1            | 7/19/2016 | 9:48           | 14                               | 7.98                  | 19.96                              | 31.9                              |
|                 | ap_0719_2            | 7/19/2016 | 13:44          | 14                               | 0.46                  | 4.14                               | 71.6                              |
|                 | ap_0719_3            | 7/19/2016 | 17:18          | 14                               | 0.19                  | 4.29                               | 81.9                              |
|                 | ap_0720_1            | 7/20/2016 | 10:52          | 14                               | 1.96                  | 9.09                               | 56.5                              |
|                 | ap_0720_2            | 7/20/2016 | 19:36          | 14                               | 0.10                  | 3.54                               | 75.0                              |
|                 | ap_0728_1            | 7/28/2016 | 10:04          | 14                               | 1.53                  | 3.97                               | 25.3                              |
|                 | ap_0728_2            | 7/28/2016 | 15:40          | 14                               | 0.75                  | 3.12                               | 32.7                              |
|                 | ap_0729_1            | 7/29/2016 | 11:04          | 14                               | 1.55                  | 5.69                               | 36.8                              |
|                 | ap_0729_2            | 7/29/2016 | 16:22          | 14                               | 0.63                  | 3.61                               | 43.6                              |
|                 | ap_0731              | 7/31/2016 | 12:18          | 14                               | 0.19                  | 2.73                               | 48.5                              |
|                 | ap_0801_1            | 8/1/2016  | 12:42          | 14                               | 0.24                  | 5.28                               | 53.1                              |
|                 | ap_0801_2            | 8/1/2016  | 17:06          | 14                               | 0.25                  | 3.23                               | 44.9                              |
|                 | ap_0802              | 8/2/2016  | 13:08          | 14                               | 0.23                  | 3.41                               | 48.5                              |
|                 | ap_0803              | 8/3/2016  | 17:22          | 14                               | 0.14                  | 2.65                               | 53.2                              |
|                 | ap_0804              | 8/4/2016  | 15:18          | 14                               | 0.27                  | 6.04                               | 53.2                              |
|                 | ap_0805_1            | 8/5/2016  | 13:14          | 14                               | 0.27                  | 6.02                               | 60.5                              |
| ap_0805_2       | 8/5/2016             | 17:42     | 28             | 0.13                             | 3.13                  | 52.4                               |                                   |
| β-caryophyllene | ca_0721              | 7/21/2016 | 11:32          | 10                               | 2.02                  | 9.73                               | 62.3                              |
|                 | ca_0724              | 7/24/2016 | 20:58          | 10                               | 0.32                  | 10.12                              | 27.6                              |
|                 | ca_0726              | 7/26/2016 | 9:58           | 10                               | 2.48                  | 8.19                               | 39.9                              |
|                 | ca_0801              | 8/1/2016  | 21:20          | 10                               | 0.24                  | 5.19                               | 24.7                              |
|                 | ca_0804              | 8/4/2016  | 11:02          | 10                               | 0.48                  | 5.60                               | 38.1                              |
|                 | ca_0806              | 8/6/2016  | 17:54          | 10                               | 0.23                  | 3.77                               | 45.6                              |

1089 <sup>a</sup>Expt ID is named as “perturbation species + date + experiment number”. For example, ap\_0801\_1  
 1090 represents the first α-pinene perturbation experiment on 08/01.

1091 <sup>b</sup>The unit for the perturbation in α-pinene and β-caryophyllene experiments is ppb. The  
 1092 perturbation amounts of α-pinene and β-caryophyllene are estimated based on the VOC injection  
 1093 volume and chamber volume. The amount of VOC injected is not the same as the amounts  
 1094 consumed by oxidants (section S6).

1095 <sup>c</sup>Average concentration during the Chamber\_Af period.

1096

1097

1098

1099

1100 Table S5. Sampling periods for the measurements at the GT site from 2012 to 2016.

| Year | Sampling Period | Note                                                                | Reference           |
|------|-----------------|---------------------------------------------------------------------|---------------------|
| 2012 | 7/21 - 9/3      | Continuously ambient measurements                                   | Xu et al. 2015 ACP  |
| 2013 | 8/1/- 8/25      | AMS alternates between ambient line and PILS line                   | Xu et al. 2017 ES&T |
| 2015 | 8/1 - 8/16      | Ambient perturbation experiments and experiments for other purposes | This study          |
| 2016 | 7/1 - 8/6       | Ambient perturbation experiments                                    | This study          |

1101  
 1102  
 1103  
 1104  
 1105  
 1106  
 1107  
 1108  
 1109  
 1110  
 1111  
 1112  
 1113  
 1114  
 1115  
 1116  
 1117  
 1118  
 1119
